# Supplementary material
Source: PubMed Central journal article supplement (PMC5332881)
Supplement: NIHMS846205-supplement-1.pdf [file NIHMS846205-supplement-1.pdf]

## **Supplementary Information for**

### **A Mesh-Duox pathway regulates homeostasis in the insect gut**

Xiaoping Xiao<sup>#</sup>, Lijuan Yang<sup>#</sup>, Xiaojing Pang<sup>#</sup>, Rudian Zhang, Yibin Zhu, Penghua Wang,  
Guanjun Gao<sup>\*</sup> and Gong Cheng<sup>\*</sup>

\* Address correspondence to:

Gong Cheng Ph.D., School of Medicine, Tsinghua University, Beijing, P.R. China, 100084.

Phone: (+86)-10-62788494; Fax: (+86)-10-62788494; E-mail:

[gongcheng@mail.tsinghua.edu.cn](mailto:gongcheng@mail.tsinghua.edu.cn)

Guanjun Gao Ph.D., School of Life Science, Tsinghua University, Beijing, P.R. China,

100084. Phone: (+86)-10-62772955; Fax: (+86)-10-62772955; E-mail:

[gaogu@mail.tsinghua.edu.cn](mailto:gaogu@mail.tsinghua.edu.cn)

# These authors contributed equally to this work.

**This PDF files includes:**

Supplementary Figures 1-21

Supplementary Tables 1-6

## Supplementary Materials:

a

| Name   | Gene Number | Length(aa) | Identity to DmMesh |
|--------|-------------|------------|--------------------|
| AaMesh | AAEL005432  | 1405       | 63%                |
| DmMesh | CG31004     | 1454       | /                  |

b

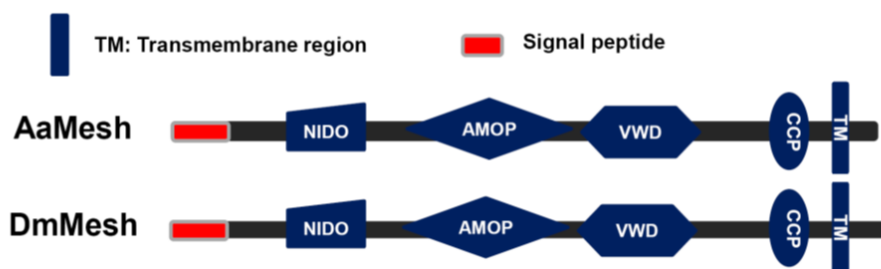

### Supplementary Figure 1

#### Bioinformatic comparison and functional module analysis of Mesh in mosquitoes and *Drosophila*

(a) Percentage of amino acid identity between *A. aegypti* (AaMesh) and *D. melanogaster* Mesh (DmMesh).

(b) Schematic representation of AaMesh and DmMesh. The functional modules were predicted using the SMART

([http://smart.embl-heidelberg.de/smart/set\\_mode.cgi?GENOMIC=1](http://smart.embl-heidelberg.de/smart/set_mode.cgi?GENOMIC=1)) and Pfam

(<http://pfam.sanger.ac.uk/>) websites.

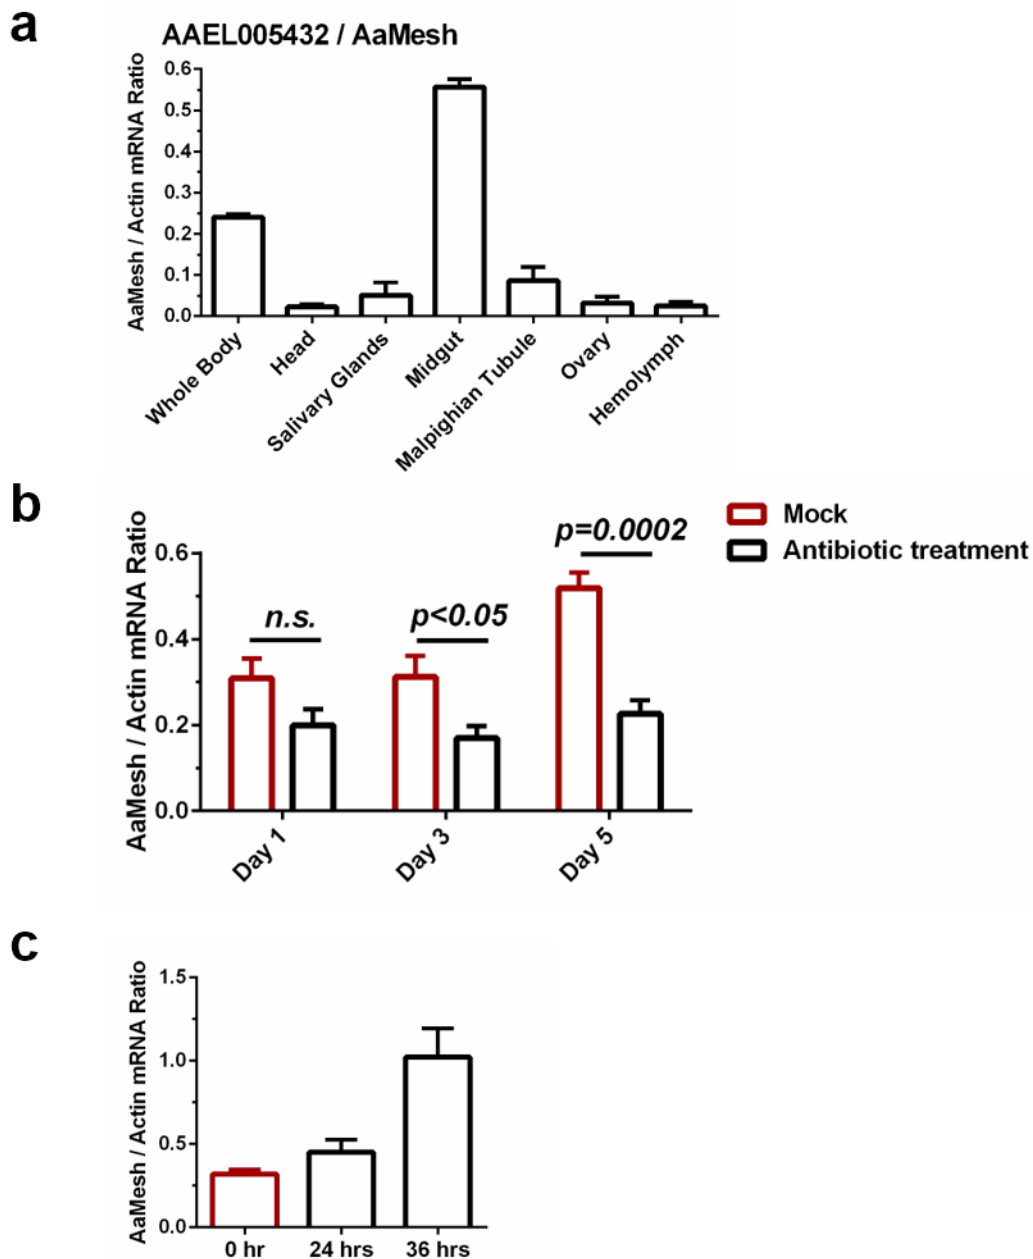

## Supplementary Figure 2

### Regulation of the *AaMesh* gene by the burden of the symbiotic microbiome in the mosquito guts

(a) Tissue distribution of *AaMesh* in *A. aegypti*.

(b) Oral introduction of antibiotics reduced the *AaMesh* expression in the mosquito guts. The midguts from the antibiotic-treated mosquitoes were isolated over a time course for *AaMesh* detection.

(c) Responses of *AaMesh* after a blood meal in the mosquito midguts. The midguts from the blood-fed mosquitoes were isolated over a time course to measure the *AaMesh* abundance.

(a-c) The total RNA was isolated from mosquito tissues to determine *AaMesh* expression by SYBR Green qPCR. The *AaMesh* abundance was normalized by *A. aegypti actin*. The qPCR primers are described in Supplementary Table 6. The data were represented as the mean  $\pm$ S.E.M. The data were analyzed using the non-parametric *Mann-Whitney* test. All results were reproduced by at least 3 independent experiments.

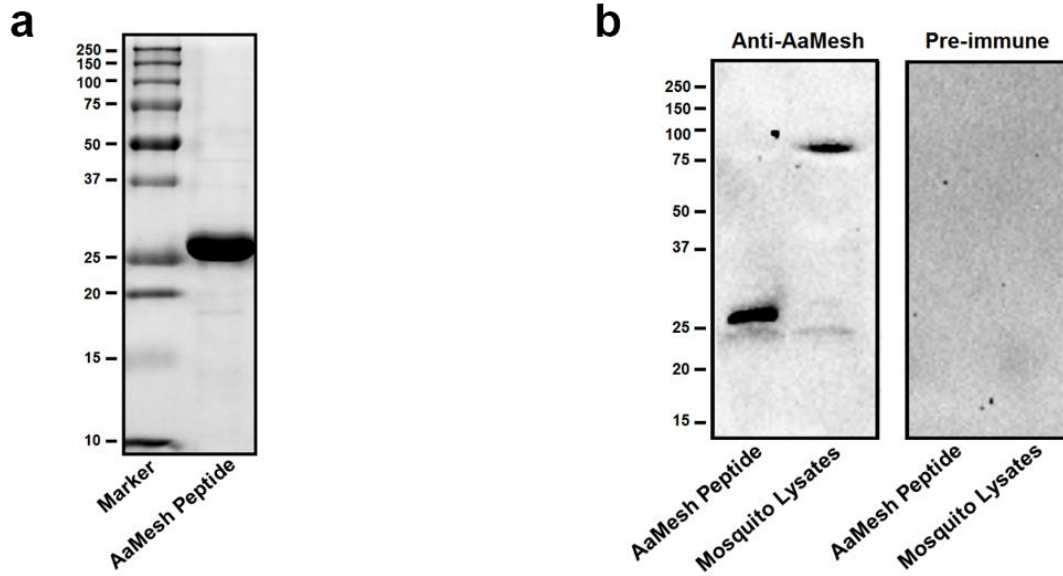

### Supplementary Figure 3

#### Generation of a murine AaMesh antibody

Generation of a murine AaMesh antibody. (a) Purification of the AaMesh peptide expressed by *E. coli*. The peptide purification was verified by SDS-PAGE with Coomassie blue staining. (b) Validation of the AaMesh polyclonal antibody. A mouse-derived AaMesh polyclonal antibody, generated by a recombinant peptide from *E. coli* (a), was used to detect the recombinant AaMesh peptide expressed by *E. coli* or the native AaMesh in mosquito lysates (Left panel). The same samples probed by murine pre-immune serum served as a negative control (Right panel).

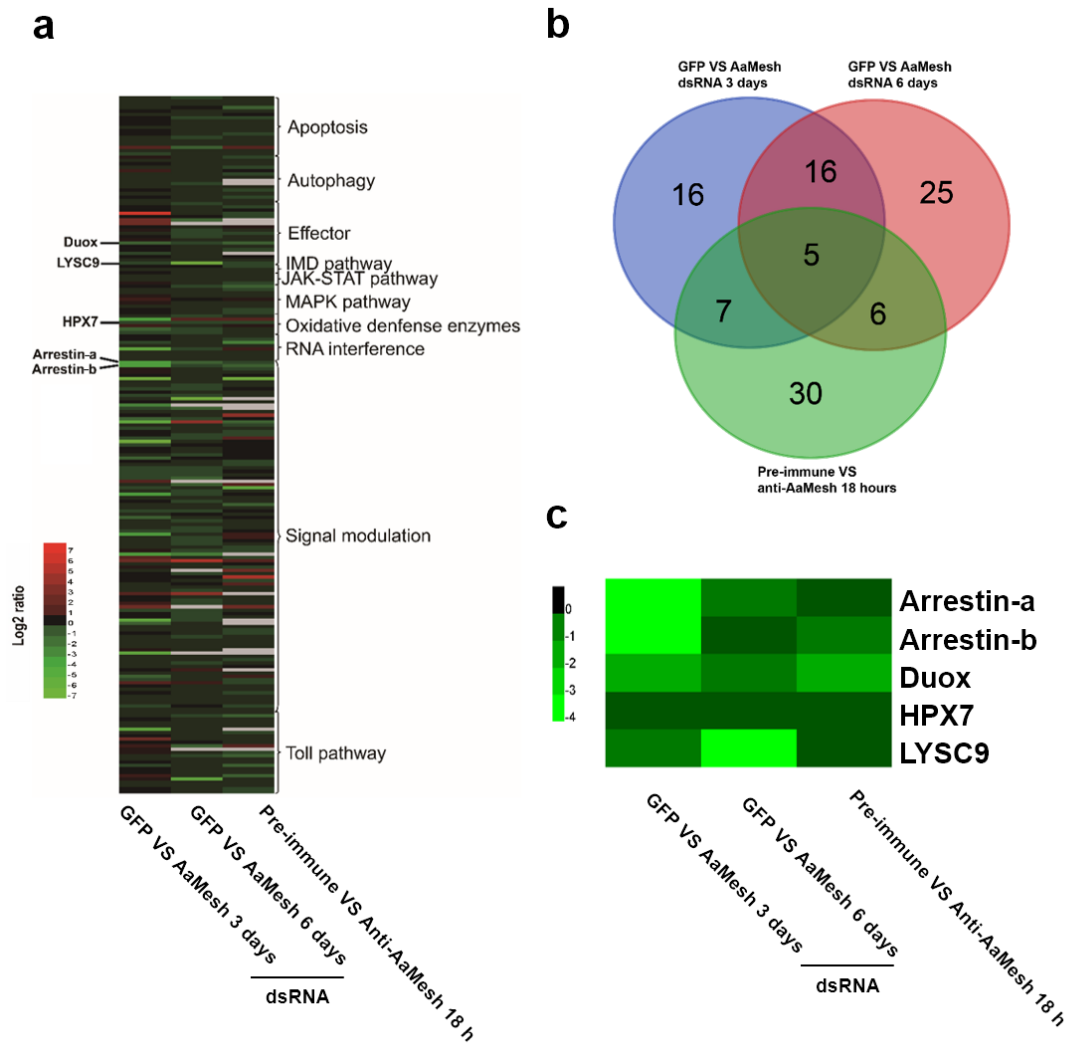

#### Supplementary Figure 4

##### Regulation of immune-related genes in the midguts of *AaMesh*-suppressed mosquitoes

*AaMesh* was silenced by dsRNA thoracic inoculation in *A. aegypti*, and the mosquito midguts were subsequently dissected at 3 days and 6 days post gene suppression. Meanwhile, the midguts of *AaMesh* antiserum-fed mosquitoes (1:100 dilution) were collected at 18 hours after a blood meal. The midguts from the *GFP* dsRNA-treated and pre-immune antiserum-fed mosquitoes served as negative controls. Gene regulation in the midguts was measured by RNA-Seq. (a) Analysis of immune-related immune signaling components, enzymes and effectors. Immune-related genes were clustered according to immune pathways and factors. (b) Overlap of down-regulated immune genes in these 3 different experimental conditions. Immune genes with log<sub>2</sub> ratio (read number in *AaMesh*-suppressed midgut / read number in

control midgut)  $\leq -0.4$  were selected for further analysis. (C) Five immune genes were consistently suppressed in the 3 different experimental conditions. The original RNA-Seq data is available in Supplementary Table 1.

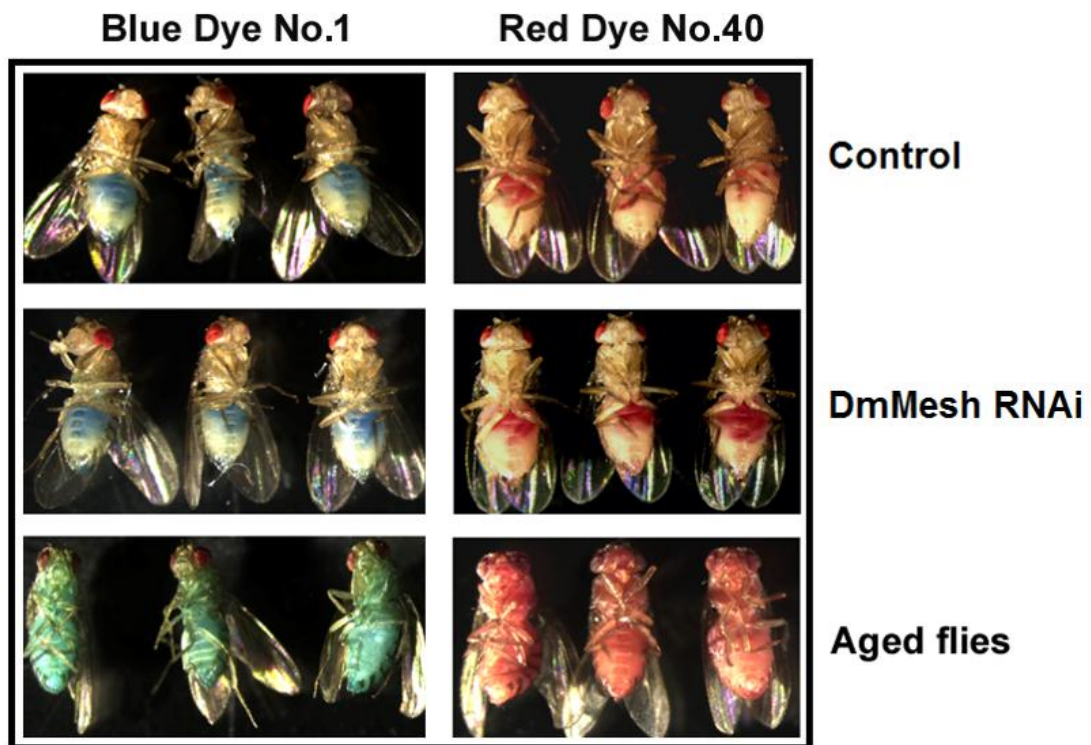

### Supplementary Figure 5

#### Measurement of the gut integrity of the *DmMesh* RNAi flies

The *DmMesh* RNAi flies were fed by regular food with 2.5% (wt/vol) Red dye no.40 or Blue dye no.1, respectively. The aged flies (30 days old) were fed by the same materials as a positive control (Aged flies). The *GFP* RNAi flies served as negative controls (Control). The experiment was reproduced by 3 times.



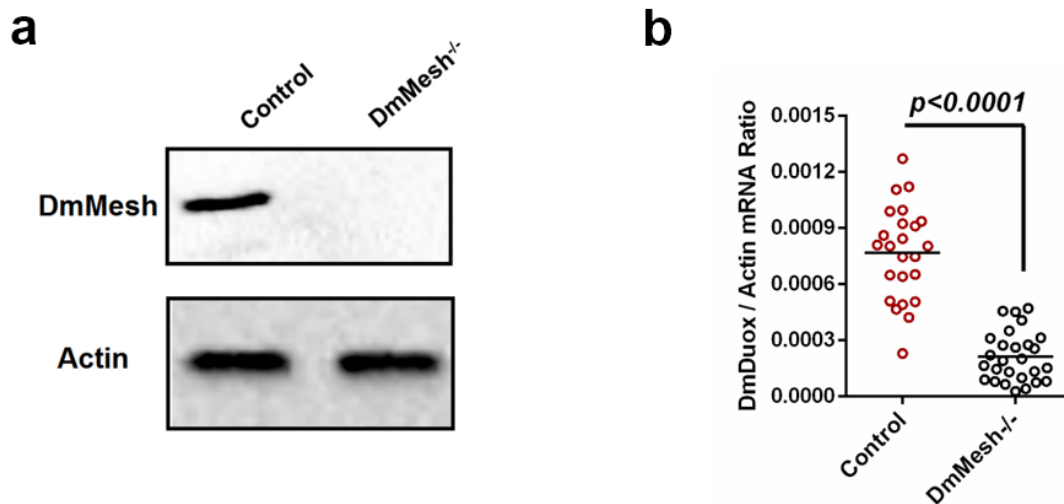

### Supplementary Figure 6

#### Regulation of *DmDuox* in homozygous *DmMesh*<sup>-/-</sup> *Drosophila* larvae.

(a) Detection of *DmMesh* in the whole homozygous *DmMesh*<sup>-/-</sup> larvae. The *DmMesh* was measured in the larvae lysates by western blotting with a murine AaMesh antibody.

(b) Regulation of *DmDuox* in homozygous *DmMesh*<sup>-/-</sup> larvae. Total RNA was isolated from the wild-type or the *DmMesh*<sup>-/-</sup> larvae to detect the *DmDuox* abundance using SYBR Green qPCR. One dot represents one fly gut. The horizontal line represents the mean value of the results. The data were analyzed using the non-parametric *Mann-Whitney* test.

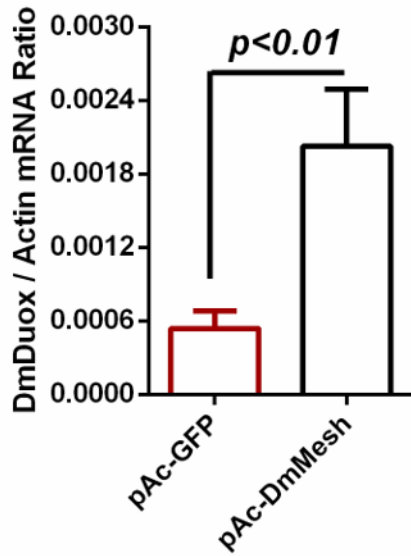

### Supplementary Figure 7

#### **Ectopic expression of *DmMesh* in *Drosophila* S2 cells enhanced *Duox* expression.**

The recombinant plasmid pAc-*DmMesh* was transfected into S2 cells. Transfection of a control plasmid pAc-*GFP* served as a negative control. *Duox* expression was determined by SYBR Green qPCR at 36 hours post transfection and normalized against *Drosophila actin* (*CG12051*). The qPCR primers are described in Supplementary Table 6. The data are presented as the mean  $\pm$  S.E.M. The data were analyzed using the non-parametric *Mann-Whitney* test. The results were repeated by 3 independent experiments.

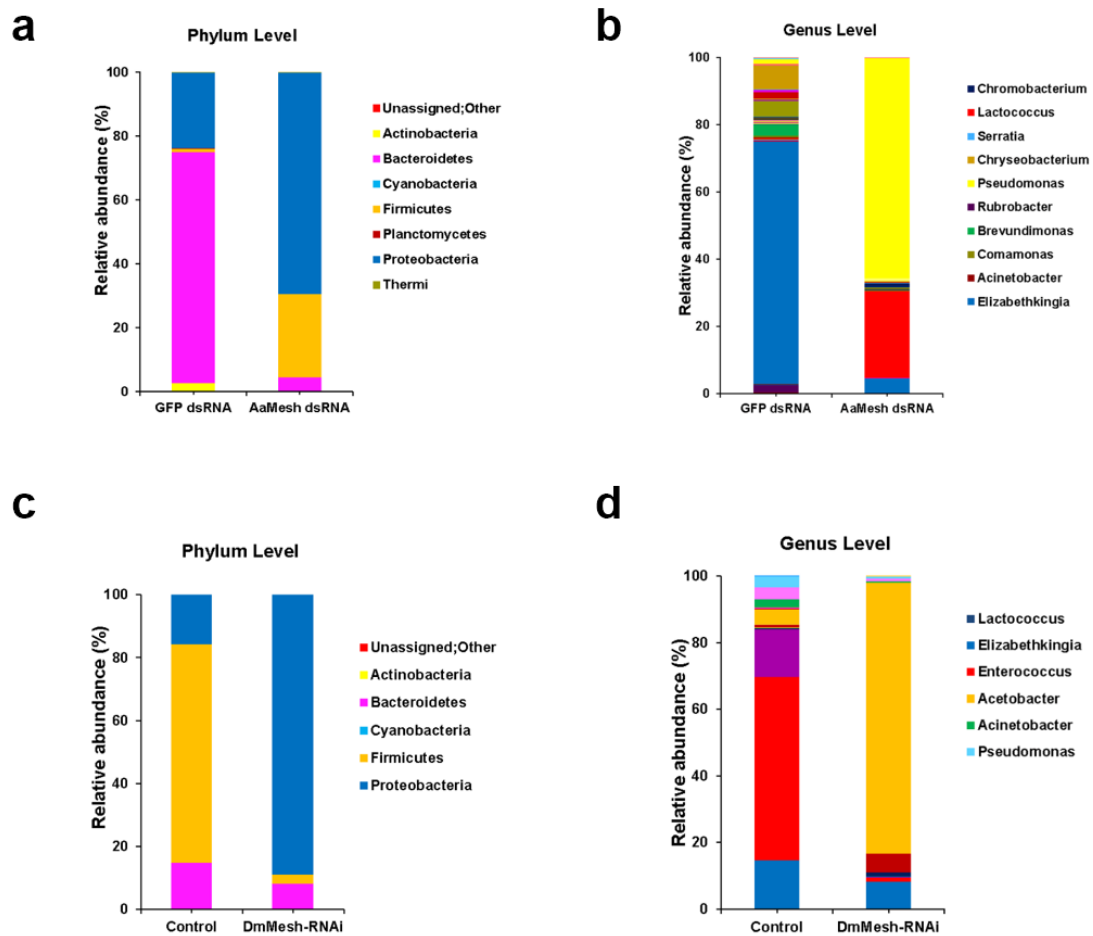

### Supplementary Figure 8

#### Regulation of gut bacterial composition in *Mesh*-silencing mosquito and *Drosophila*

The guts of *AaMesh*-silenced mosquito (a-b) and *DmMesh* RNAi *Drosophila* (c-d) were exploited for a 16S rDNA sequencing. The midguts of *AaMesh*-silenced mosquito were isolated at 6 days post dsRNA thoracic microinjection. The *GFP* dsRNA-microinjected mosquitoes and *GFP* RNAi flies were used as mock controls. The gut bacterial composition was analyzed by *QIIME*.

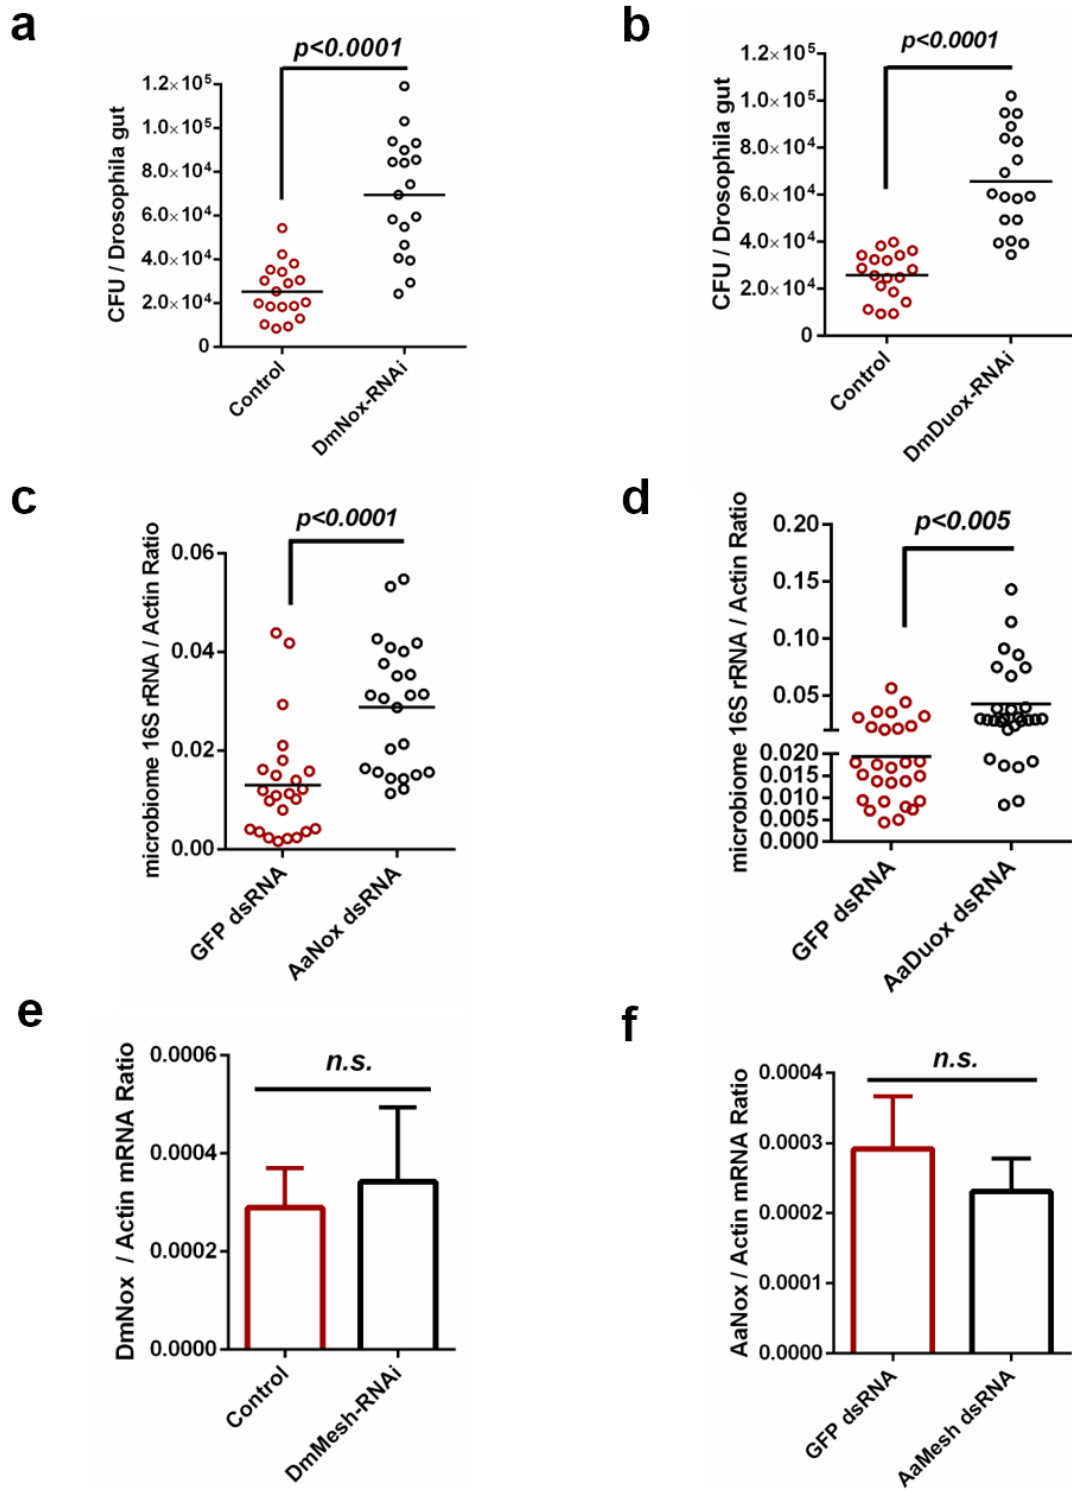

**Supplementary Figure 9**

Mesh regulates *Duox*, but not *Nox* expression, for regulation of gut microbiome in *A. aegypti* and *Drosophila*

(a-b) Regulation of the gut commensal bacteria in the *DmNox* (a) and *DmDuox* (b) RNAi

*Drosophila*. Both *DmNox* RNAi and *DmDuox* RNAi GAL4 *Drosophila* lines were driven by a midgut-specific *NP3084* promoter. *GFP* RNAi flies were used as negative controls. The burden of gut microbes was determined by a CFU assay.

(c-d) Knockdown of either *AaNox* (c) or *AaDuox* (d) enhanced the burden of gut microbiome in *A. aegypti*. The genes were silenced via thoracic microinjection of dsRNA. The *GFP* dsRNA-treated mosquitoes served as mock controls. The 16S rRNA was measured by SYBR Green qPCR and normalized against *A. aegypti actin* (*AAEL011197*). The qPCR primers are described in Supplementary Table 6. One dot represents one gut. The horizontal line represents the mean value of the results.

(e-f) Silencing *Mesh* does not regulate the *Nox* expression in *Drosophila* (e) and mosquito (f). The *Nox* genes was measured by SYBR Green qPCR. The qPCR primers are described in Supplementary Table 6.

(a-b, e-f) The data are presented as the mean  $\pm$  S.E.M. (a-f) The data were analyzed using the non-parametric *Mann-Whitney* test. All results were repeated by 3 independent experiments.

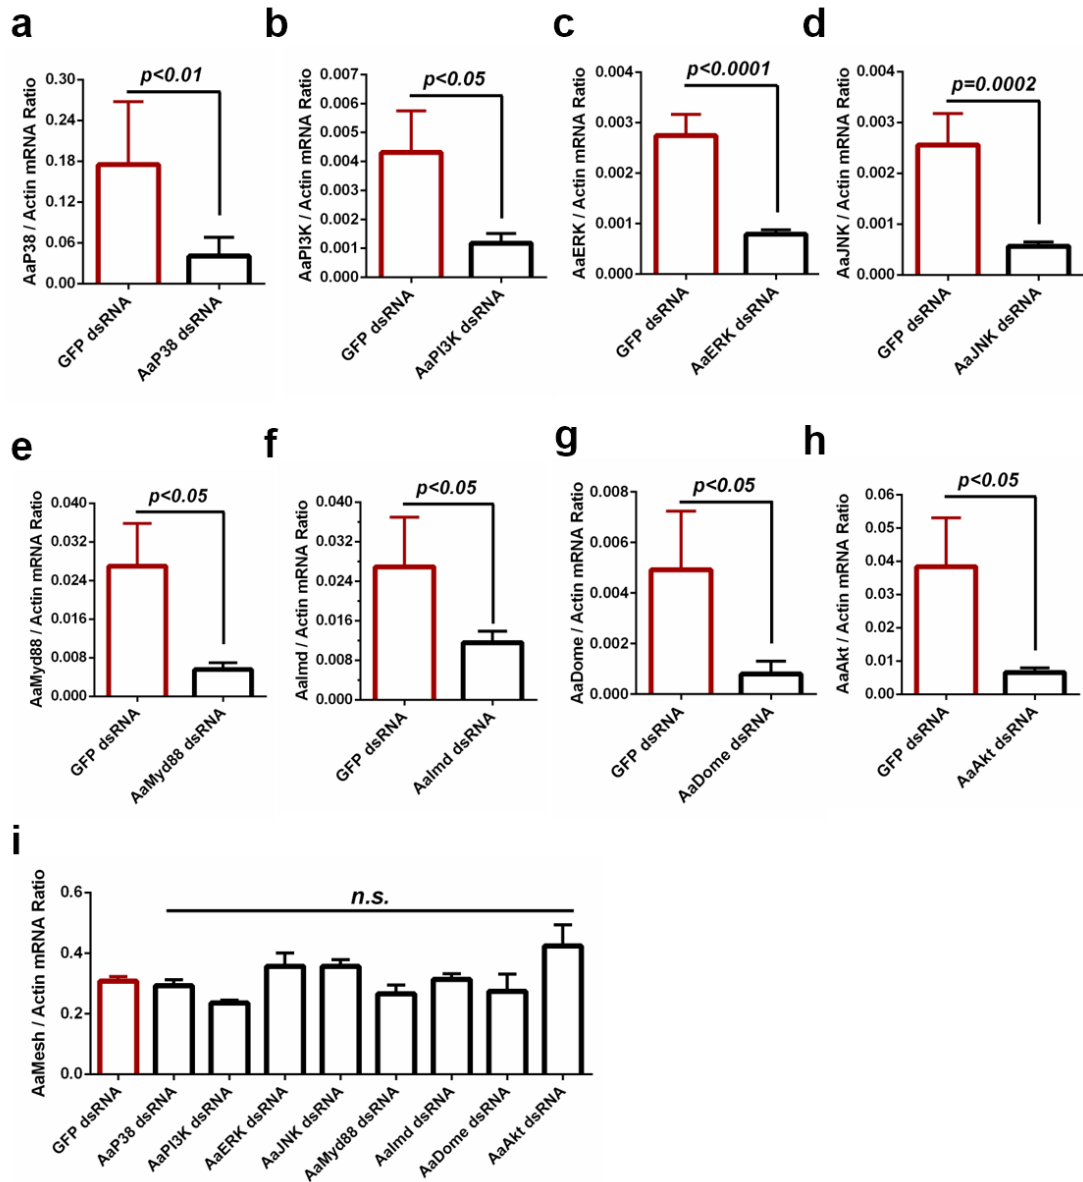

**Supplementary Figure 10**

**Regulation of the *AaMesh* mRNA abundance in the midguts of the immune components-silenced mosquitoes**

The dsRNA of these immune component genes were inoculated into mosquitoes. *GFP* dsRNA served as a mock control. The midguts of the treated mosquitoes were dissected 6 days after dsRNA inoculation. The expression levels of both immune component genes (a-h) and *AaMesh* (i) were determined by SYBR Green qPCR and normalized by *A. aegypti actin*. The qPCR primers are described in Supplementary Table 6. The data were represented as the mean  $\pm$  S.E.M. The data were analyzed using the non-parametric *Mann-Whitney* test.

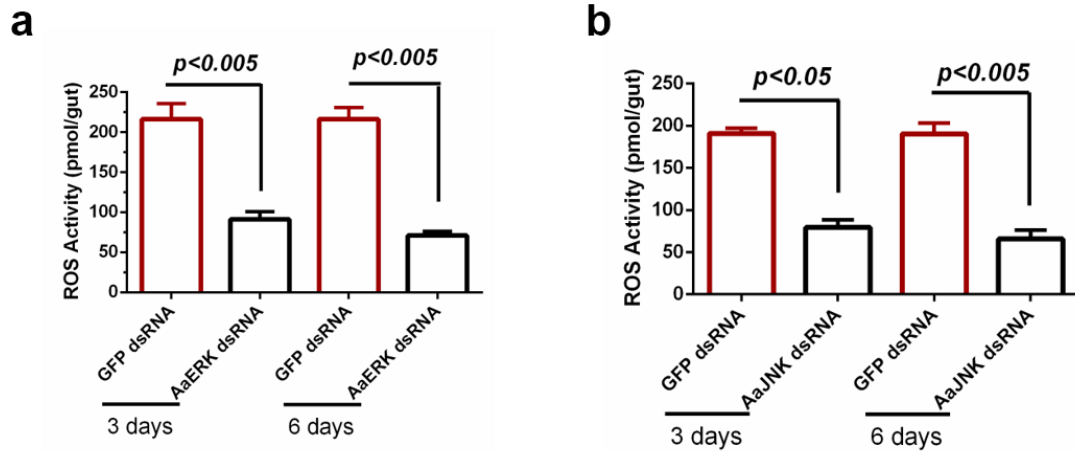

### Supplementary Figure 11

#### Regulation of ROS activity in the guts of *AaERK*- and *AaJNK*-silenced mosquitoes.

Regulation of ROS activity in the guts of *AaERK*- and *AaJNK*-silenced mosquitoes. The ROS activity was detected using a H<sub>2</sub>O<sub>2</sub> assay. *GFP* dsRNA-treated mosquitoes served as mock controls. The data were presented as the mean  $\pm$  S.E.M. The data were analyzed using the non-parametric *Mann-Whitney* test. The results were combined from 3 independent experiments.

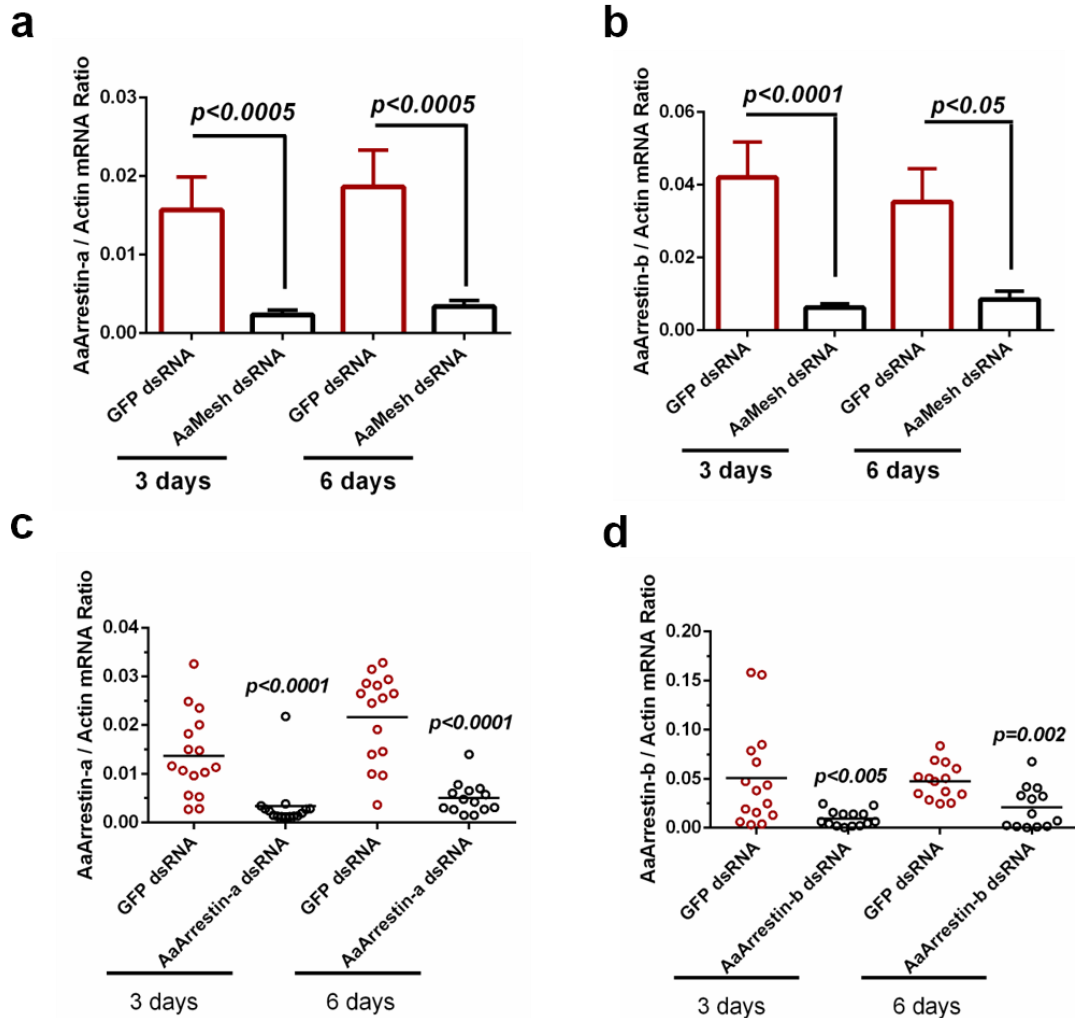

### Supplementary Figure 12

#### Regulation of *AaArrestin* genes in the midguts of *AaMesh* silencing mosquitoes, and knockdown efficiency of *AaArrestins* in the mosquito midguts

(a-b) The *AaMesh* gene was silenced via thoracic dsRNA microinjection. *GFP* dsRNA-inoculated mosquitoes served as mock controls. Both *AaArrestin-a* (a) and *AaArrestin-b* (b) mRNA abundance in the midguts of *AaMesh* silencing mosquitoes was assessed by SYBR Green qPCR. The data were presented as the mean  $\pm$  S.E.M.

(c-d) Two *AaArrestins* dsRNAs were inoculated into mosquitoes. *GFP* dsRNA served as a mock control. The midguts of the treated mosquitoes were dissected after dsRNA inoculation. The expression levels of *AaArrestin-a* (c) and *AaArrestin-b* (d) were determined using SYBR Green qPCR and normalized by *A. aegypti actin*. One dot represents one mosquito gut. The



horizontal line represents the mean value of the results.

(a-d) The qPCR primers are described in Supplementary Table 6. The data were analyzed using the non-parametric *Mann-Whitney* test.

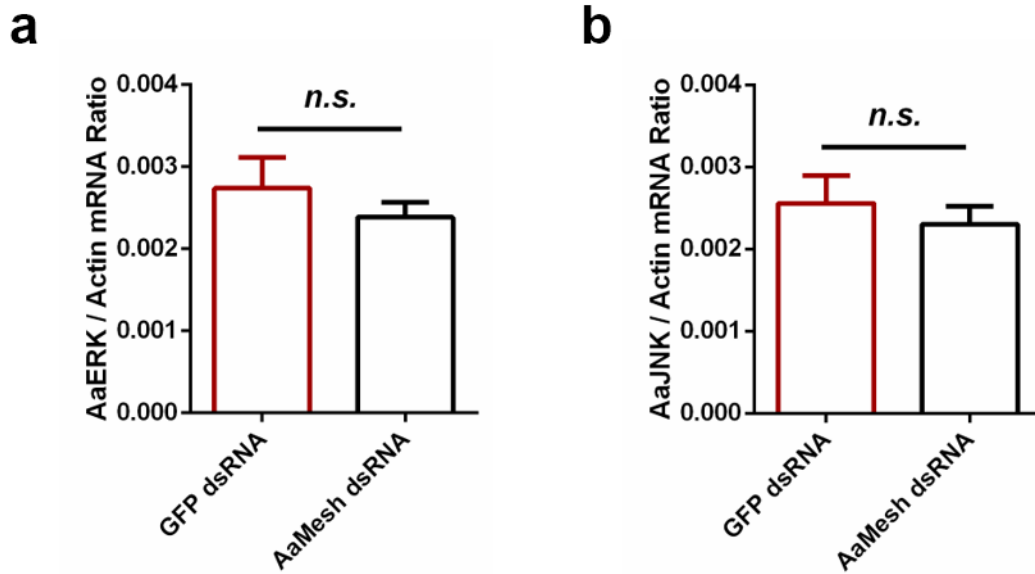

### Supplementary Figure 13

#### Regulation of *AaERK* and *AaJNK* in the midguts of *AaMesh* silencing mosquitoes

Both *AaERK* (a) and *AaJNK* (b) mRNA were assessed by SYBR Green qPCR in the midguts of *AaMesh* silencing mosquitoes. *GFP* dsRNA-inoculated mosquitoes served as mock controls. The qPCR primers are described in Supplementary Table 6. The data were represented as the mean  $\pm$  S.E.M. The data were analyzed using the non-parametric *Mann-Whitney* test.

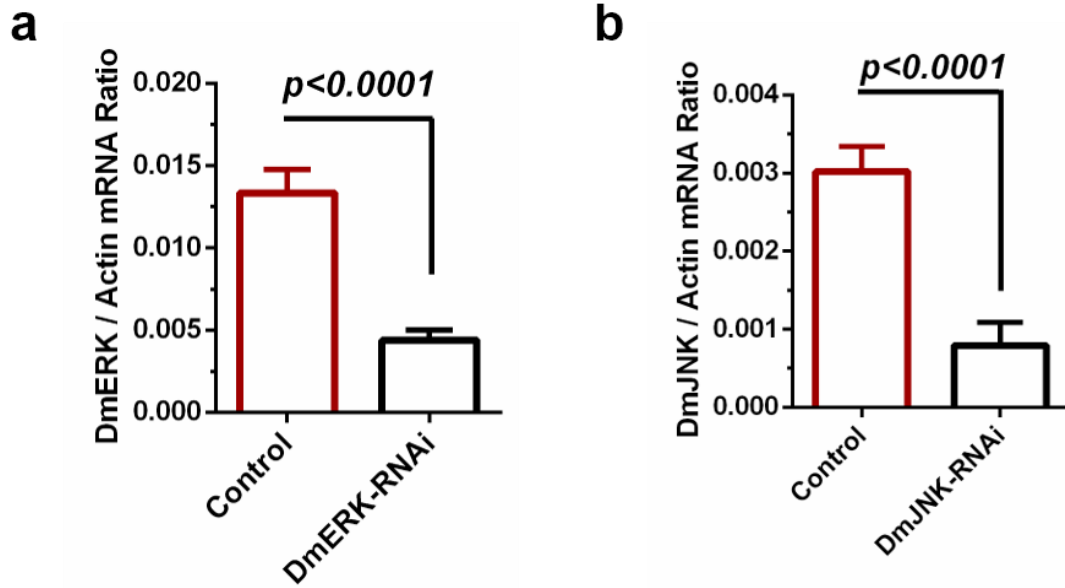

#### Supplementary Figure 14

##### Knockdown efficiency in *DmERK* and *DmJNK* RNAi *Drosophila*

Knockdown efficiency in *DmERK* (a) and *DmJNK* (b) RNAi *Drosophila*. The *DmERK* and *DmJNK* RNAi *Drosophila* strains were generated by a GAL4 line driven by *NP3084* promoter. The *NP3084 / GFP-RNAi* flies served as a negative control. The mRNA abundance in the midguts of *DmERK* and *DmJNK* RNAi flies was assessed by SYBR Green qPCR. The qPCR primers are described in Supplementary Table 6. The data were presented as the mean  $\pm$  S.E.M.

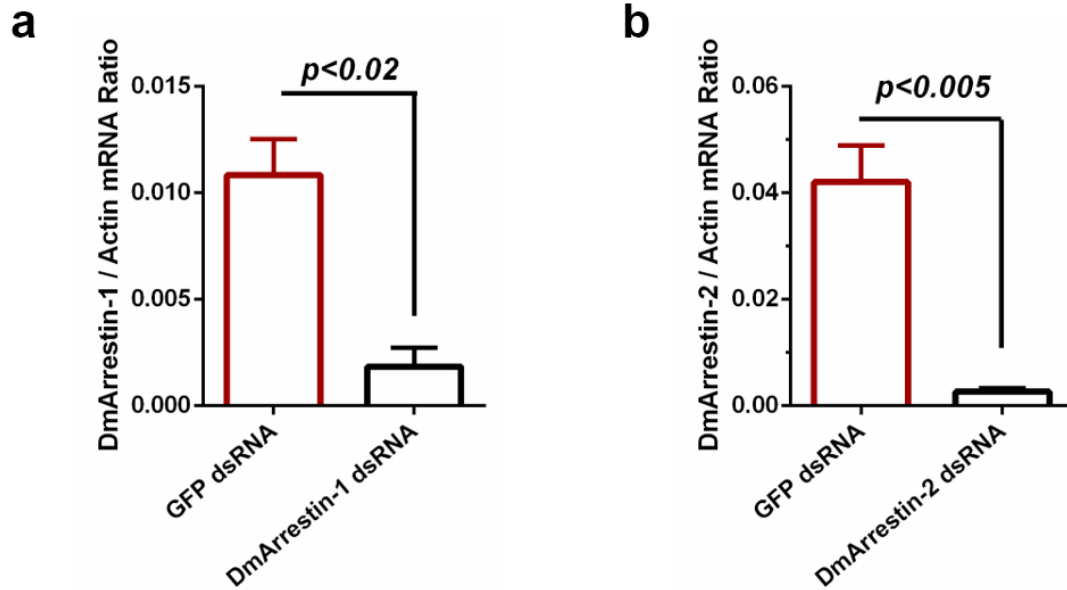

### Supplementary Figure 15

#### Knockdown efficiency of *DmArrestin-1* and *DmArrestin-2* in S2 cells

Both *DmArrestin-1* (a) and *DmArrestin-2* (b) were silenced by dsRNA transfection in the *Drosophila* S2 cells. The abundance of the *DmArrestins* gene was determined by SYBR Green qPCR and normalized by *Drosophila actin* (*CG12051*). The qPCR primers are described in Supplementary Table 6. The data were represented as the mean  $\pm$  S.E.M. The data were analyzed using the non-parametric *Mann-Whitney* test.

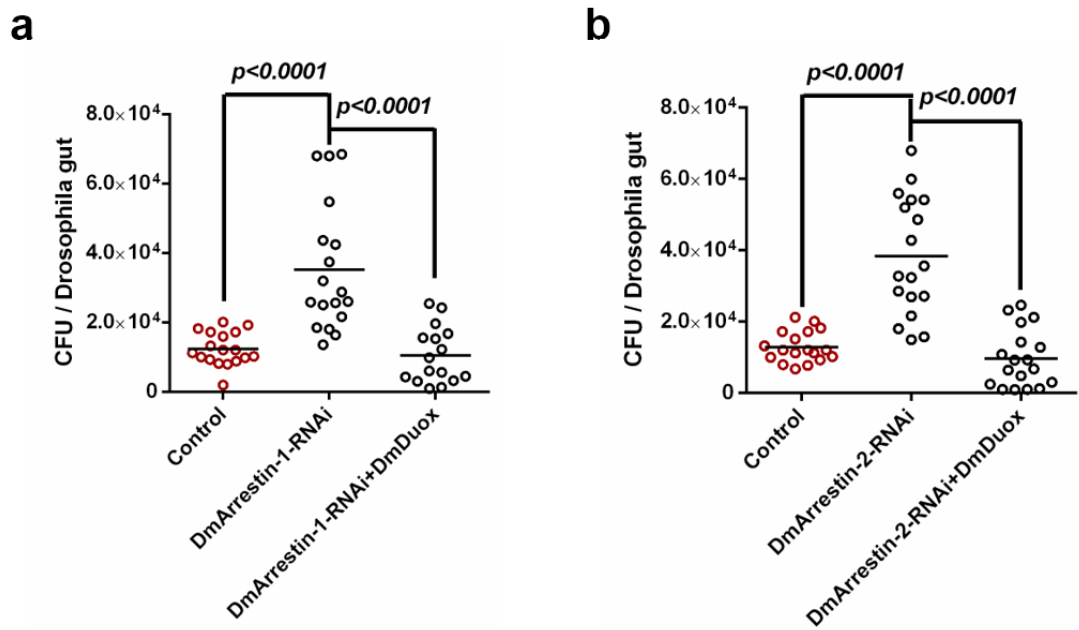

### Supplementary Figure 16

#### Reduction of burden of gut microbiome by rescuing *DmDuox* into the *DmArrestin*-RNAi flies.

(a-b) Ectopic expression of *DmDuox* into the *DmArrestin-1* (a) and *DmArrestin-2* (b) RNAi flies reduced the burden of gut microbiome, respectively. The burden of the gut microbiome was determined by a CFU assay. *GFP* RNAi flies served as mock controls. One dot represents a *drosophila* gut. The horizontal line represents the mean value of the results. The data were analyzed using the non-parametric *Mann-Whitney* test. All results were repeated by 3 independent experiments.

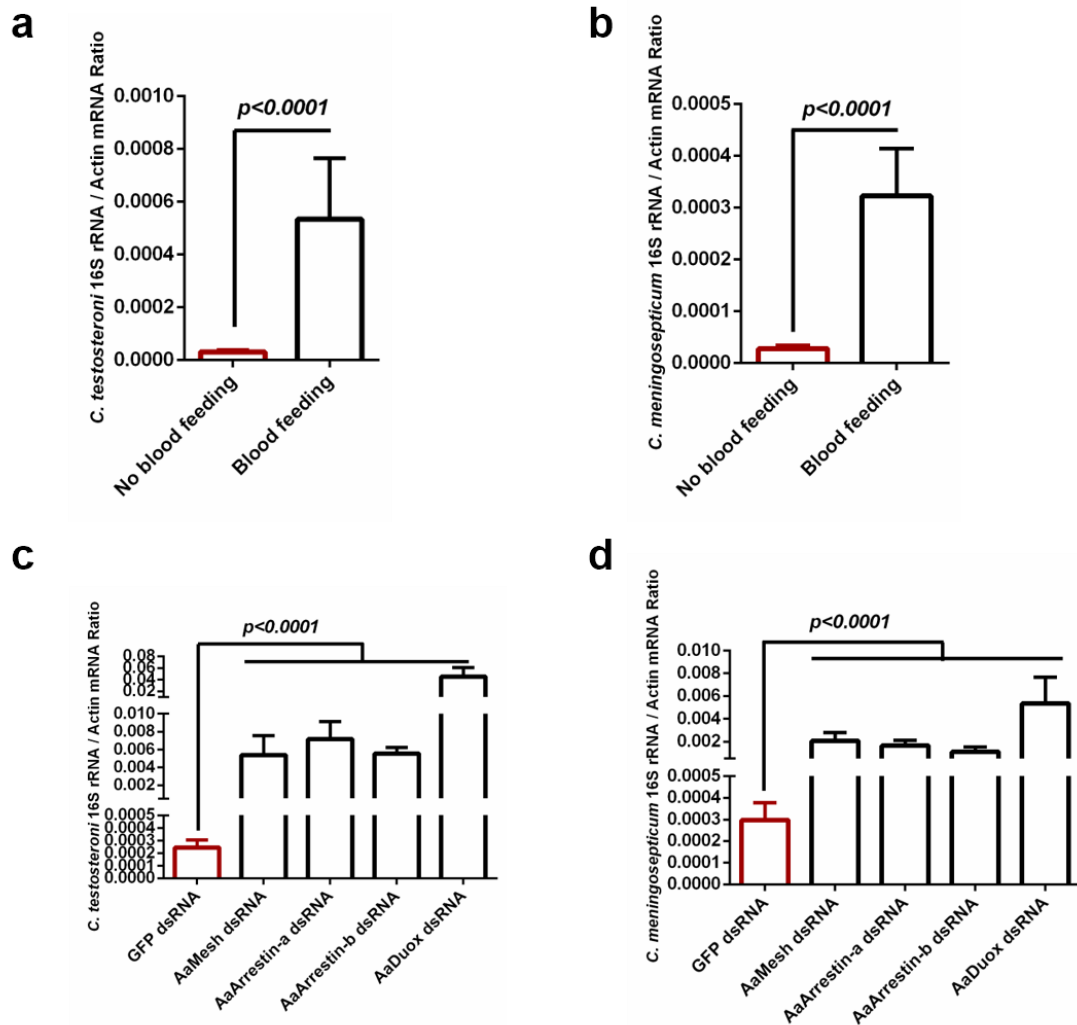

### Supplementary Figure 17

#### Regulation of gut commensal bacteria in either the blood feeding mosquitoes or the AaMesh signaling-interrupted mosquitoes

(a-b) Regulation of burdens of gut commensal bacteria in blood feeding. Both *C. testosteronei* and *C. meningosepticum* have been routinely identified as cultivable gut commensals in *Aedes* mosquitoes. The mosquito midguts, isolated at 12 hours post blood feeding, were collected for detection of *C. testosteronei* (a) and *C. meningosepticum* (b) burden by qPCR. The midguts of mosquito fed with sugar served as a negative control.

(c-d) Genetic interruption of Mesh-mediated signaling components enhanced the burden of these gut bacteria. *AaMesh*, *AaArrestin-a*, *AaArrestin-b* and *AaDuox* were silenced by dsRNA thoracic inoculation in *A. aegypti*, respectively. Mosquitoes inoculated by *GFP* dsRNA were

used as negative controls. The mosquito midguts, isolated at 12 hours post blood feeding, were collected for detection of *C. testosteroni* (c) and *C. meningosepticum* (d) burden by qPCR.

(a-d) The bacterial 16S rRNA was determined by SYBR Green qPCR and normalized against *A. aegypti actin*. The qPCR primers are described in Supplementary Table 6. The data were represented as the mean  $\pm$  S.E.M. The data were analyzed using the non-parametric *Mann-Whitney* test. All results were repeated by 3 independent experiments.

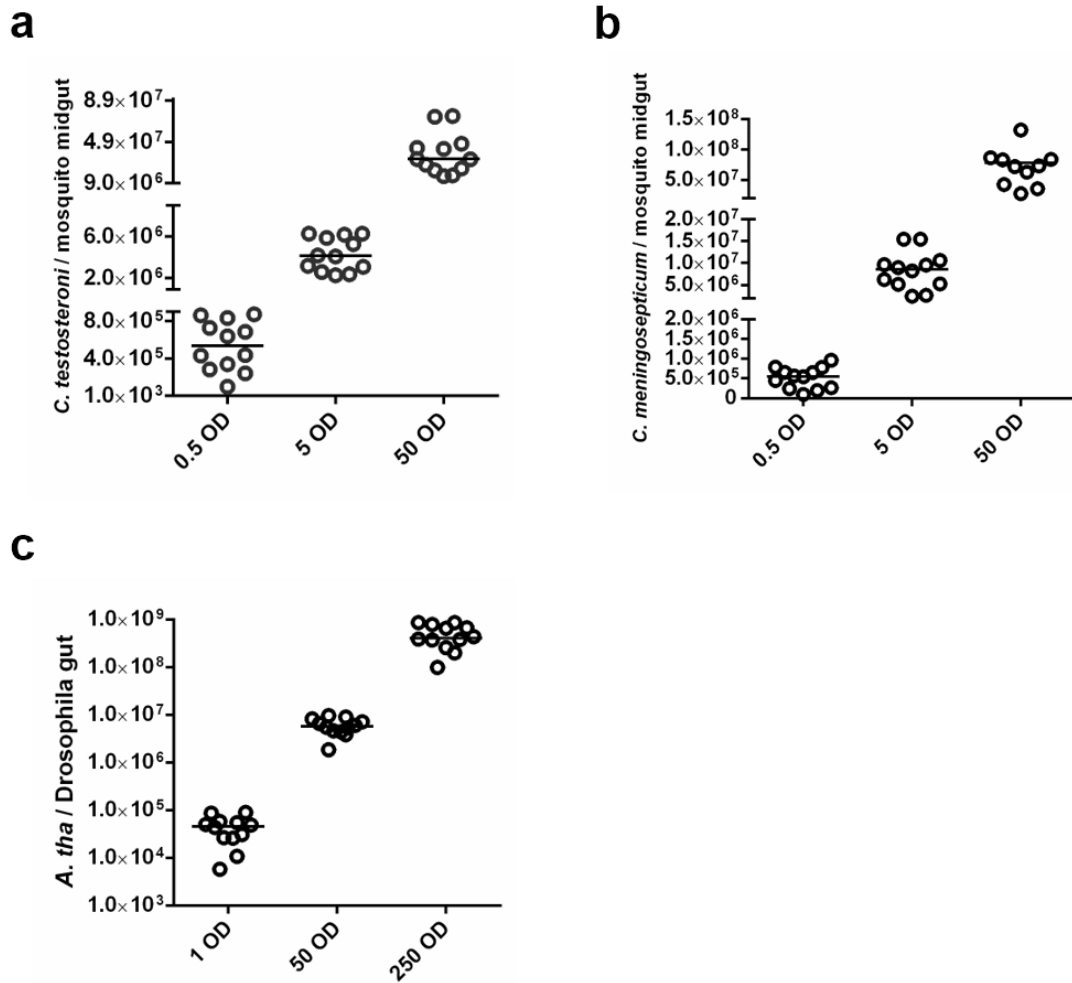

### Supplementary Figure 18

#### Counting the number of acquired bacteria in the midgut of individual *Drosophila* and mosquito.

(a) Counting the number of acquired *C. testosteroni* in the midgut of individual mosquito. A serial of *C. testosteroni* (0.5 OD, 5 OD and 50 OD) with fresh blood was exploited to feed the antibiotic-treated mosquitoes.

(b) Measurement of the number of acquired *C. meningosepticum* in the midgut of individual mosquito. A serial of *C. meningosepticum* (0.5 OD, 5 OD and 50 OD) with fresh blood was fed into the antibiotic-treated mosquitoes.

(c) Determining the number of acquired *A. thailandicus* in the midgut of individual *Drosophila*. A serial of *A. thailandicus* (1 OD, 50 OD and 250 OD), mixed with the standard *Drosophila* food respectively, was exploited to feed the germ-free flies. The germ-free flies



were hatched and reared in an aseptic condition.

(a-c) Twelve insects in each group were randomly selected for the gut isolation, and subsequently the bacterial number was counted by a CFU assay. One dot represents an insect gut. The horizontal line represents the mean value of the results.

Natural condition

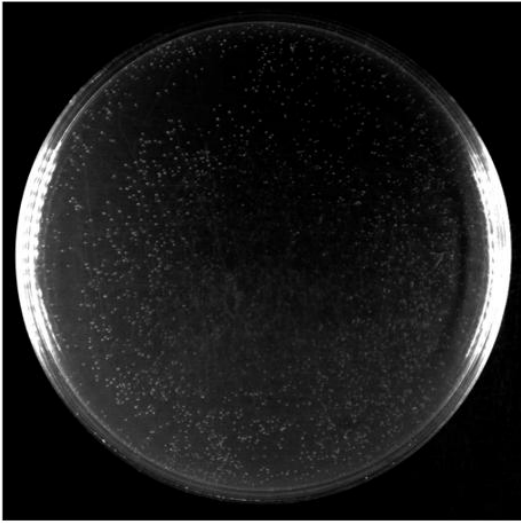

Germ-free condition

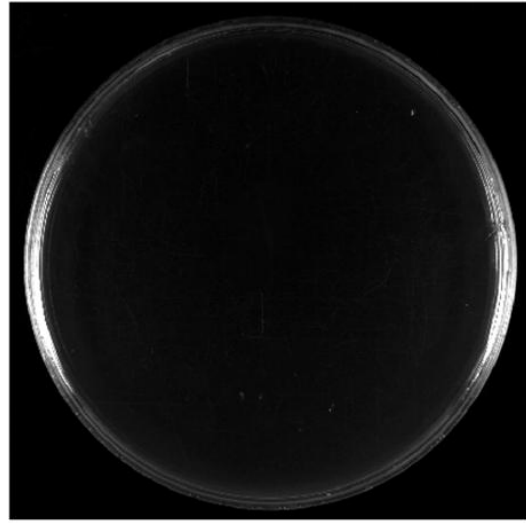

**Supplementary Figure 19**

**Validation of aseptic condition in the midgut of germ-free flies**

The midguts of untreated flies and germ-free flies were ground in PBS buffer. Bacterial number was assessed by a CFU assay on LB plates.

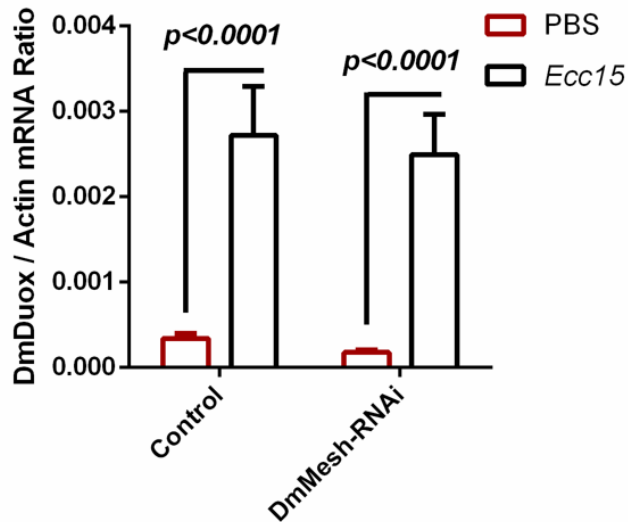

### Supplementary Figure 20

#### The role of Mesh-mediated signaling pathway in response to pathogen infection of *Drosophila*

A *Drosophila* pathogen, *Erwinia carotovora carotovora* 15 (*Ecc15*), was used to feed both *DmMesh-RNAi* and control flies, with the standard *Drosophila* food. The flies fed by the standard *Drosophila* food with PBS buffer acted as mock controls. The *DmDuox* expression in the *Drosophila* midgut was determined by qPCR and normalized against *Drosophila actin*. The qPCR primers are described in Supplementary Table 6. The data were represented as the mean  $\pm$  S.E.M. The data were analyzed using the non-parametric *Mann-Whitney* test. The experiment was repeated 3 times with the similar results.

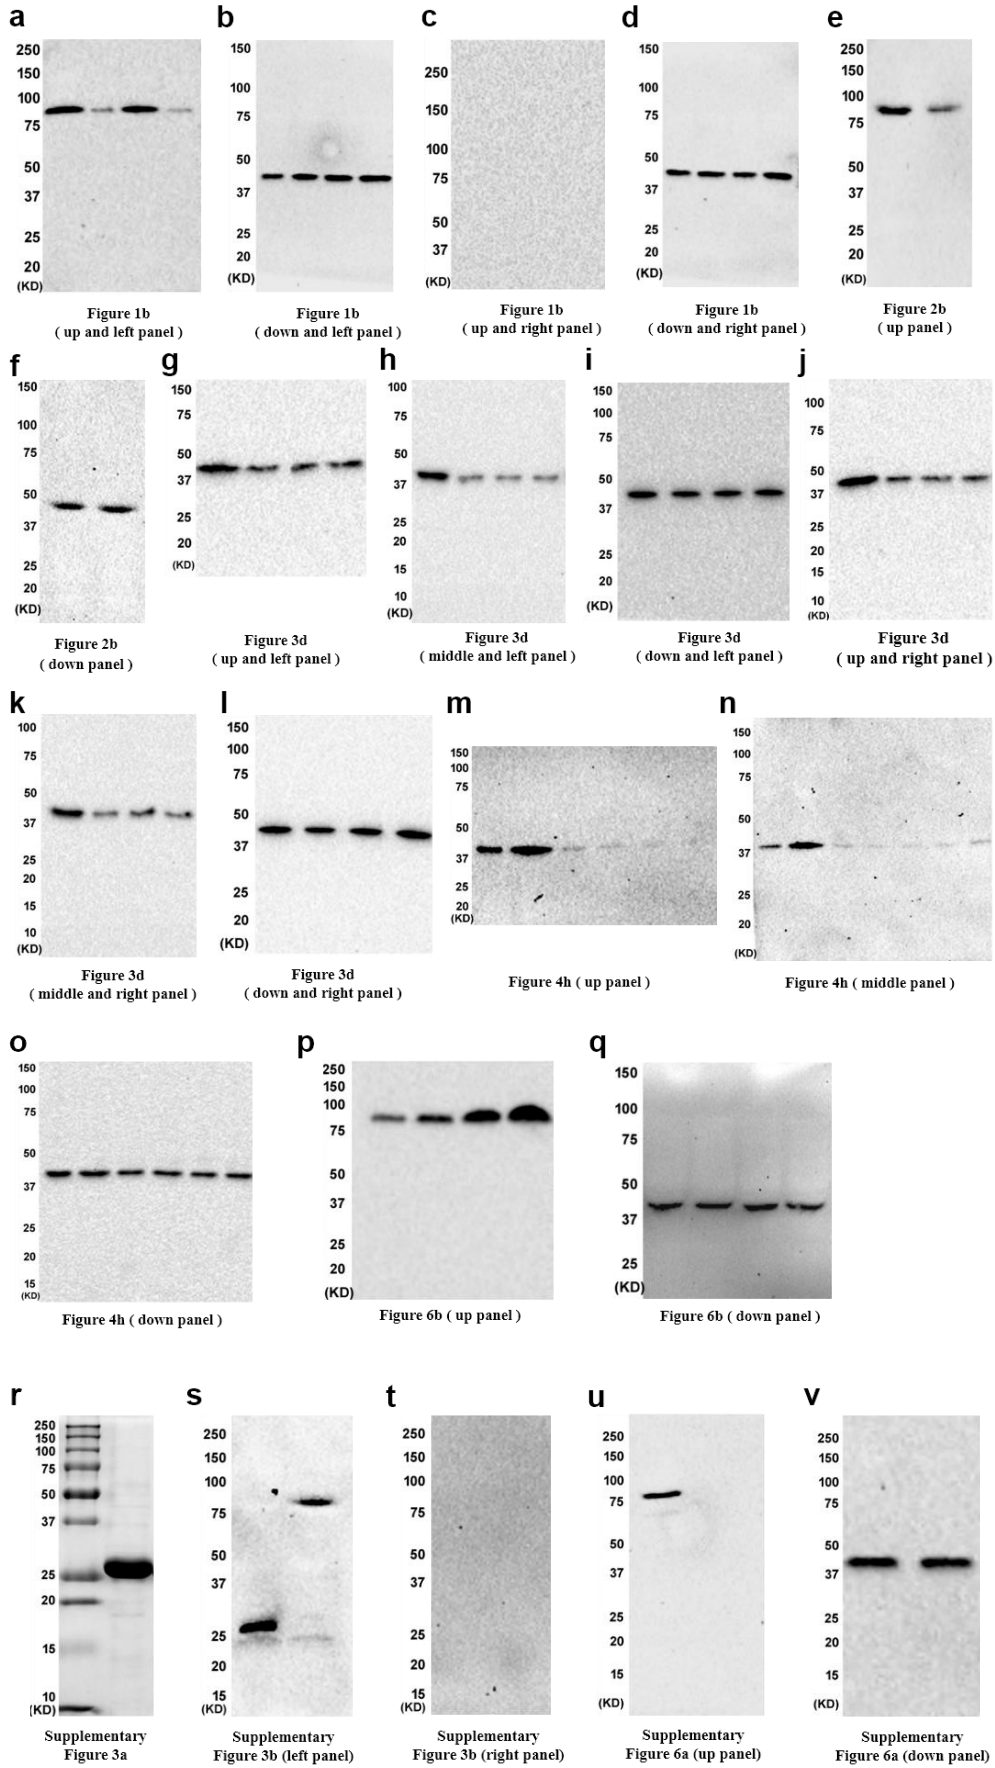

## Supplementary Figure 21

### Full-length blots from Figures 1, 2, 3, 4, 6 and Supplementary Figure 3 and 6

**a-d**, Validation of an AaMesh antibody in the guts of *AaMesh*-silenced mosquitoes. **e-f**, The knockdown efficiency in the guts of *DmMesh* RNAi flies. **g-l**, Genetic suppression of *AaMesh* and *AaArrestins* impaired the phosphorylation of AaERK and AaJNK in the mosquito guts. **m-o**, Both *DmArrestin-1* and *DmArrestin-2* knockdown suppressed the phosphorylation of DmERK (p-ERK) and DmJNK (p-JNK) in the pAc-DmMesh-transfected *Drosophila* S2 cells. **p-q**, Oral introduction of *A. thailandicus* (*A. tha*) induced the DmMesh expression. **r**, Purification of the AaMesh peptide expressed by *E. coli*. **s-t**, Validation of the AaMesh polyclonal antibody. **u-v**, Detection of DmMesh in the whole homozygous *DmMesh*<sup>-/-</sup> larvae.

**Supplementary Table 1. Regulation of immune genes in the AaMesh-impaired midguts**

| Function Group | Gene Name              | Gene Number | Log <sub>2</sub> Ratio         |                                |                            |
|----------------|------------------------|-------------|--------------------------------|--------------------------------|----------------------------|
|                |                        |             | <i>AaMesh/GFP</i> dsRNA 3 days | <i>AaMesh/GFP</i> dsRNA 6 days | AaMesh antibody/Pre-immune |
| Apoptosis      | CASPL1                 | AAEL014148  | 0.866733469                    | -0.573991383                   | 0.371968777                |
| Apoptosis      | CASPL2                 | AAEL011562  | 0.188337039                    | 0.145523658                    | 0.195819326                |
| Apoptosis      | CASPS1                 | AAEL014658  | -0.161785657                   | -0.177313602                   | 0.262449253                |
| Apoptosis      | CASPS15                | AAEL005963  | 0.72177919                     | 1.696470816                    | -1.883186335               |
| Apoptosis      | CASPS16                | AAEL005956  | 1.427785992                    | 0.101492988                    | -0.301040728               |
| Apoptosis      | CASPS17                | AAEL005955  | 0.76650987                     | 0.267933205                    | 0.914752713                |
| Apoptosis      | CASPS18                | AAEL003439  | 1.145098894                    | -0.380170847                   | -0.643306487               |
| Apoptosis      | CASPS19                | AAEL003444  | 1.304355465                    | -0.087132592                   | -0.079246751               |
| Apoptosis      | CASPS21                | AAEL017498  | 1.345387068                    | 0.189342455                    | -0.227561524               |
| Apoptosis      | CASPS7                 | AAEL012143  | 0.476237656                    | 0.232947603                    | 0.122702992                |
| Apoptosis      | CASPS8                 | AAEL014348  | 1.299022184                    | -0.215344126                   | 0.110451451                |
| Apoptosis      | CED-6                  | AAEL012967  | 0.962788921                    | -0.288244969                   | -1.114783447               |
| Apoptosis      | CED-6                  | AAEL012821  | 0.835428233                    | -0.523323435                   | 0.102447269                |
| Apoptosis      | IAP1                   | AAEL009074  | 0.435079065                    | 0.045968739                    | -0.029902063               |
| Apoptosis      | IAP2                   | AAEL006633  | 0.573374526                    | 0.41289414                     | -0.092331881               |
| Apoptosis      | IAP5                   | AAEL014251  | 5.247927513                    | -2.150559677                   | 5.169925001                |
| Apoptosis      | IAP6                   | AAEL012446  | 0.86270769                     | 0.259828739                    | 0.339269992                |
| Apoptosis      | IAP9                   | AAEL012512  | -0.91195904                    | 0.519002697                    | 0.338305301                |
| Autophagy      | Autophagy related gene | AAEL016987  | 2.455511249                    | 0.678071905                    | -1.482663925               |
| Autophagy      | Autophagy related gene | AAEL013995  | 0.710280486                    | 0.620599545                    | 0.337625029                |
| Autophagy      | Autophagy related gene | AAEL003799  | 1.093841754                    | 0.382333334                    | 0.027593369                |
| Autophagy      | Autophagy related gene | AAEL013815  | 0.473069621                    | -0.023458973                   | -0.887525271               |
| Autophagy      | Autophagy related gene | AAEL013063  | 4.061111514                    | -0.271708739                   | 1.566346823                |

|                  |                        |            |              |              |              |
|------------------|------------------------|------------|--------------|--------------|--------------|
| <b>Autophagy</b> | Autophagy related gene | AAEL002286 | 0.344959064  | -0.157227375 | -0.44170545  |
| <b>Autophagy</b> | Autophagy related gene | AAEL010641 | 0.157744731  | 0.054290156  | 0.24687739   |
| <b>Autophagy</b> | Autophagy related gene | AAEL010516 | 0.486514013  | -0.064011758 | NA           |
| <b>Autophagy</b> | Autophagy related gene | AAEL010427 | 0.234929068  | -0.36882907  | NA           |
| <b>Autophagy</b> | Autophagy related gene | AAEL009105 | 0.384945434  | 0.154520308  | 0.140106884  |
| <b>Autophagy</b> | Autophagy related gene | AAEL009089 | 1.003260329  | -0.221916363 | -1.31802364  |
| <b>Autophagy</b> | Autophagy related gene | AAEL007228 | 0.719892081  | -0.031478231 | 0.121745272  |
| <b>Autophagy</b> | Autophagy related gene | AAEL007162 | 1.452032718  | 0.230617753  | -0.68475139  |
| <b>Autophagy</b> | Autophagy related gene | AAEL000955 | 0.258286795  | 0.178078885  | -0.019628807 |
| <b>Effector</b>  | CECA                   | AAEL000627 | 0.403064858  | -0.628199595 | 0.39550533   |
| <b>Effector</b>  | CECB                   | AAEL004223 | 1.33451934   | 0.332097641  | -0.375600475 |
| <b>Effector</b>  | CECE                   | AAEL000611 | 1.789015331  | 0.690415267  | 1.588998014  |
| <b>Effector</b>  | CECG                   | AAEL015515 | 10.56605404  | 0.424256029  | -1.486792082 |
| <b>Effector</b>  | CECH                   | AAEL017211 | 1.647160134  | 0.955422372  | -0.353677149 |
| <b>Effector</b>  | CECI                   | AAEL000775 | 6.044394119  | -1.988684687 | NA           |
| <b>Effector</b>  | CECJ                   | AAEL000777 | 6.781359714  | NA           | NA           |
| <b>Effector</b>  | CECN                   | AAEL000621 | 1.881499958  | -0.07028694  | 2.584962501  |
| <b>Effector</b>  | DEFA                   | AAEL003841 | 2.392947558  | -0.601941822 | -0.305986551 |
| <b>Effector</b>  | DEFC                   | AAEL003832 | 0.088103992  | -0.850118517 | -1.116592129 |
| <b>Effector</b>  | DEFD                   | AAEL003857 | 1.243905394  | -0.352015925 | 0.713658221  |
| <b>Effector</b>  | DEFE                   | AAEL003849 | 2.795943715  | 0.199267951  | -0.192854544 |
| <b>Effector</b>  | DUOX                   | AAEL007563 | -2.1069153   | -1.2251198   | -2.3923174   |
| <b>Effector</b>  | LYSC11                 | AAEL003723 | 1.241286834  | -0.051640464 | 0.268458078  |
| <b>Effector</b>  | LYSC4                  | AAEL017132 | 1.139189408  | -0.013838907 | -1.413691074 |
| <b>Effector</b>  | LYSC6                  | AAEL005988 | -0.514573173 | 0.319459839  | NA           |
| <b>Effector</b>  | LYSC7A                 | AAEL010100 | 1.378792194  | 0.362832734  | 0.924259485  |

|                                  |         |            |              |              |              |
|----------------------------------|---------|------------|--------------|--------------|--------------|
| <b>Effector</b>                  | LYSC7B  | AAEL015404 | 0.724276503  | 0.058686624  | -0.005810818 |
| <b>Effector</b>                  | LYSC9   | AAEL009670 | -1.128104826 | -6.491853096 | -0.415037499 |
| <b>Imd</b>                       | IMD     | AAEL010083 | 1.025068034  | 1.49810411   | -0.416555327 |
| <b>Imd</b>                       | REL2    | AAEL007624 | 0.542460733  | -0.062510979 | 0.106041637  |
| <b>JAK-STAT</b>                  | DOME    | AAEL012471 | 0.934972433  | 0.034716205  | 0.130396637  |
| <b>JAK-STAT</b>                  | HOP     | AAEL012553 | 0.732402506  | 0.357223986  | -0.300062526 |
| <b>JAK-STAT</b>                  | STAT1   | AAEL009692 | 0.242360838  | 0.004907131  | 0.097447145  |
| <b>MAPK</b>                      | Erk1/2  | AAEL013939 | 2.328948523  | 0.811487537  | -0.707819249 |
| <b>MAPK</b>                      | Erk1/2  | AAEL007958 | 2            | -0.662268227 | -1.584962501 |
| <b>Imd</b>                       | IKK1    | AAEL003245 | 0.267365898  | 0.065517411  | -0.437835628 |
| <b>Imd</b>                       | IKK2    | AAEL012510 | 0.506347946  | -0.052626931 | -0.0222559   |
| <b>MAPK</b>                      | JNK     | AAEL008634 | 2.75996742   | -0.138552375 | -0.153912683 |
| <b>MAPK</b>                      | JNK     | AAEL008622 | 3.30580843   | 0.911190733  | 3.169925001  |
| <b>MAPK</b>                      | MAPKK   | AAEL003359 | 2.251178048  | 0.398031074  | -0.042228235 |
| <b>MAPK</b>                      | MAPKK   | AAEL001622 | 0.548533714  | -0.157791246 | 0.268551411  |
| <b>MAPK</b>                      | MAPKK4  | AAEL003013 | 1.371808564  | 0.17954942   | -0.37378585  |
| <b>MAPK</b>                      | P38MAPK | AAEL008379 | 0.956572235  | 0.028083784  | -0.371429065 |
| <b>Oxidative defense enzymes</b> | HPX2    | AAEL013171 | 0.528694281  | -0.623271858 | 0            |
| <b>Oxidative defense enzymes</b> | HPX6    | AAEL012481 | -4.807354922 | 5.392317423  | 4.807354922  |
| <b>Oxidative defense enzymes</b> | HPX7    | AAEL004401 | -0.421137699 | -0.832722068 | -0.459431619 |
| <b>Oxidative defense enzymes</b> | HPX8A   | AAEL004388 | 4.087462841  | -0.061029433 | 3            |
| <b>Oxidative defense</b>         | HPX8B   | AAEL004390 | -1.988684687 | -0.579047487 | 0.292180751  |



| enzymes                          |                 |            |              |              |              |
|----------------------------------|-----------------|------------|--------------|--------------|--------------|
| <b>Oxidative defense enzymes</b> | PERC            | AAEL004386 | -0.584962501 | -0.620887782 | 0.763932642  |
| <b>RNA interference</b>          | Dicer-1         | AAEL006794 | 1.282132927  | 0.165222382  | -0.237797114 |
| <b>RNA interference</b>          | Dicer-1         | AAEL001612 | 1.666262603  | 0.725140159  | -0.61667136  |
| <b>RNA interference</b>          | PIWI            | AAEL008076 | -0.584962501 | 0.045596866  | -3.906890596 |
| <b>RNA interference</b>          | PIWI            | AAEL007823 | 0.456664595  | -0.31000571  | -0.251626734 |
| <b>RNA interference</b>          | PIWI3           | AAEL013692 | -5.209453366 | -0.663204524 | 4.247927513  |
| <b>RNA interference</b>          | PIWI4           | AAEL007698 | 0.151248052  | -0.138914779 | -0.0726278   |
| <b>RNA interference</b>          | PIWI5           | AAEL013233 | 0.325416027  | 0.07854711   | 0.043990014  |
| <b>RNA interference</b>          | PIWI6           | AAEL013227 | 0.392317423  | 0.071181565  | 0.236687535  |
| <b>Signal Modulation</b>         | Arrestin a      | AAEL013535 | -4.11401626  | -1.9541963   | -0.551045006 |
| <b>Signal Modulation</b>         | Arrestin b      | AAEL003116 | -4.282692932 | -0.403064858 | -1.9995094   |
| <b>Signal Modulation</b>         | beta-arrestin 1 | AAEL013704 | 2.512907564  | 0.408962985  | -0.333423734 |
| <b>Signal Modulation</b>         | beta-arrestin 1 | AAEL012004 | 2.122228259  | 0.214563048  | 0.176453044  |
| <b>Signal Modulation</b>         | CLIP            | AAEL014005 | 1.224630894  | -0.169618859 | 0.905003486  |
| <b>Signal Modulation</b>         | CLIP            | AAEL014004 | -7.562242424 | 0.326500825  | -6.523561956 |
| <b>Signal Modulation</b>         | CLIP            | AAEL003279 | 0.675377796  | 0.010397847  | 0.257332046  |
| <b>Signal Modulation</b>         | CLIP            | AAEL009726 | 0.307572802  | -0.648903322 | 0.393663848  |
| <b>Signal Modulation</b>         | CLIP            | AAEL009722 | -1.227640499 | -0.397849567 | 2.060120992  |
| <b>Signal Modulation</b>         | CLIP            | AAEL001098 | 1.67474218   | -0.246179186 | 0            |
| <b>Signal Modulation</b>         | CLIP            | AAEL006576 | -1.19962753  | -0.719844592 | 0.721344614  |
| <b>Signal Modulation</b>         | CLIP            | AAEL014724 | -0.263034406 | -6.584962501 | NA           |
| <b>Signal Modulation</b>         | CLIPA1          | AAEL002601 | 1.345644164  | 0.402437462  | 0            |
| <b>Signal Modulation</b>         | CLIPA15         | AAEL002126 | -2.807354922 | NA           | NA           |
| <b>Signal Modulation</b>         | CLIPA16         | AAEL008404 | -0.94753258  | -2.478047297 | NA           |

|                   |          |            |              |              |              |
|-------------------|----------|------------|--------------|--------------|--------------|
| Signal Modulation | CLIPA17  | AAEL007006 | 0.08246216   | -0.309684499 | 0.584962501  |
| Signal Modulation | CLIPB    | AAEL017555 | 1.66862043   | 0.232734366  | 7.238404739  |
| Signal Modulation | CLIPB1   | AAEL000074 | -2.492598483 | -0.646762329 | 1.495810123  |
| Signal Modulation | CLIPB13B | AAEL003253 | -5.672425342 | 7.14974712   | -1.974004791 |
| Signal Modulation | CLIPB15  | AAEL014349 | 0.635977787  | 0.289096702  | -0.41686717  |
| Signal Modulation | CLIPB19  | AAEL000059 | -0.936806174 | 0.012600037  | 0            |
| Signal Modulation | CLIPB21  | AAEL001084 | 1.986579484  | -0.144816553 | -0.584962501 |
| Signal Modulation | CLIPB22  | AAEL008668 | 1.829269698  | -0.40053793  | -0.591360272 |
| Signal Modulation | CLIPB23  | AAEL012785 | -0.807354922 | -0.956056652 | 5.321928095  |
| Signal Modulation | CLIPB24  | AAEL014140 | -6.375039431 | -0.109624491 | 1.021695071  |
| Signal Modulation | CLIPB25  | AAEL014137 | -0.94753258  | 1            | 1.054447784  |
| Signal Modulation | CLIPB27  | AAEL007993 | 0.998783049  | -0.264216216 | 1.307281319  |
| Signal Modulation | CLIPB28  | AAEL013245 | 1.064130337  | 0.025535092  | 1            |
| Signal Modulation | CLIPB29  | AAEL006674 | -0.002729793 | -0.413580477 | 1.345208919  |
| Signal Modulation | CLIPB30  | AAEL000760 | -2.256339753 | 1.708233876  | 1.041820176  |
| Signal Modulation | CLIPB31  | AAEL006161 | 1.763437806  | 0.673556424  | -1           |
| Signal Modulation | CLIPB33  | AAEL000099 | 0.084064265  | 0.090480746  | -1.457472766 |
| Signal Modulation | CLIPB34  | AAEL000028 | -0.694865495 | -0.49413258  | 0.645211611  |
| Signal Modulation | CLIPB35  | AAEL000037 | -1.335603032 | -0.675761333 | 1.261585189  |
| Signal Modulation | CLIPB36  | AAEL017325 | -1.079727192 | -0.379530956 | 0.537797393  |
| Signal Modulation | CLIPB37  | AAEL005431 | -0.402546555 | -1.755515991 | 1            |
| Signal Modulation | CLIPB39  | AAEL003632 | 5.087462841  | NA           | NA           |
| Signal Modulation | CLIPB40  | AAEL003614 | -0.321928095 | -1.598078001 | 4.906890596  |
| Signal Modulation | CLIPB41  | AAEL003631 | -0.906890596 | 0.275634443  | -5.491853096 |
| Signal Modulation | CLIPB42  | AAEL006168 | 0.08246216   | -0.986325063 | 0            |
| Signal Modulation | CLIPB43  | AAEL014354 | -5.044394119 | -0.448862377 | 0.956931278  |

|                   |         |            |              |              |              |
|-------------------|---------|------------|--------------|--------------|--------------|
| Signal Modulation | CLIPB45 | AAEL001077 | 0.446800062  | -0.005427072 | -0.233097122 |
| Signal Modulation | CLIPB46 | AAEL005093 | 1.758637386  | -0.51603216  | -0.13439594  |
| Signal Modulation | CLIPB5  | AAEL005064 | 0.331621491  | 0.059297184  | -2.14543044  |
| Signal Modulation | CLIPB6  | AAEL000038 | 0.673349495  | -0.277533976 | 0.523051899  |
| Signal Modulation | CLIPB8  | AAEL003625 | -1.286579833 | -0.645867849 | 1.361280923  |
| Signal Modulation | CLIPB9  | AAEL003610 | -0.137503524 | 1.95419631   | -0.125530882 |
| Signal Modulation | CLIPC1  | AAEL011991 | -1.652076697 | -0.11042399  | 1.584962501  |
| Signal Modulation | CLIPC12 | AAEL012711 | 0.074000581  | -0.700439718 | 0.672425342  |
| Signal Modulation | CLIPC13 | AAEL012712 | -0.316857105 | -0.054861935 | 0.846194664  |
| Signal Modulation | CLIPC2  | AAEL007593 | -0.328084955 | -0.402933013 | 0.244611046  |
| Signal Modulation | CLIPC3  | AAEL007597 | -0.841302254 | -0.463400521 | 1.823677227  |
| Signal Modulation | CLIPC5A | AAEL004518 | -4           | 0.731183242  | 4            |
| Signal Modulation | CLIPC5B | AAEL004524 | 0.087462841  | -1.086711633 | 4            |
| Signal Modulation | CLIPC6  | AAEL004540 | -0.234465254 | -0.4896763   | 1            |
| Signal Modulation | CLIPD1  | AAEL007796 | 0.256339753  | -0.877794068 | 0.156725504  |
| Signal Modulation | CLIPD6  | AAEL002124 | 0.086877451  | -0.24954217  | -0.358793389 |
| Signal Modulation | CLIPD7  | AAEL015439 | 3.097412502  | -0.571415969 | -0.480625841 |
| Signal Modulation | CLIFE11 | AAEL005800 | -4.754887502 | -3.807354922 | NA           |
| Signal Modulation | CLIFE8  | AAEL005792 | 5.209453366  | 0.231815675  | -0.598637438 |
| Signal Modulation | CTL14   | AAEL011453 | 6.442943496  | 8.21916852   | 5.357552005  |
| Signal Modulation | CTL16   | AAEL000533 | 0.50389089   | 0            | 1.579085934  |
| Signal Modulation | CTL18   | AAEL005482 | 2.133814289  | -0.005697405 | -0.78956873  |
| Signal Modulation | CTL20   | AAEL011407 | 0.10433666   | NA           | 6.918863237  |
| Signal Modulation | CTL24   | AAEL002524 | 1.732220592  | -0.836501268 | -0.263034406 |
| Signal Modulation | CTL25   | AAEL000556 | 1.035502985  | 1            | 8.703903573  |
| Signal Modulation | CTL6    | AAEL003119 | 1.770605736  | -0.076466536 | -0.400735066 |

|                   |          |            |              |              |              |
|-------------------|----------|------------|--------------|--------------|--------------|
| Signal Modulation | CTLGA1   | AAEL011078 | 0.827163403  | 1.330916878  | 4.95419631   |
| Signal Modulation | CTLGA2_b | AAEL013853 | 0.503110747  | 0.39818443   | 0.108059746  |
| Signal Modulation | CTLGA3   | AAEL011070 | 0.672835257  | -0.512554005 | -0.2410081   |
| Signal Modulation | CTLGA4   | AAEL017484 | 5.584962501  | 7.118941073  | NA           |
| Signal Modulation | CTLGA5   | AAEL005641 | 1.870108873  | -0.139463898 | -0.026685658 |
| Signal Modulation | CTLGA7   | AAEL017265 | 1.464551454  | -0.377988054 | 0.223350704  |
| Signal Modulation | CTLGA8   | AAEL011610 | 3.997265032  | -0.533914895 | 0.547487795  |
| Signal Modulation | CTLGA9_a | AAEL014385 | 5.857980995  | NA           | 5.781359714  |
| Signal Modulation | CTLMA11  | AAEL000543 | -0.501880759 | -0.662965013 | 0.486698484  |
| Signal Modulation | CTLMA12  | AAEL011455 | 1.664815808  | -1.104469267 | 1            |
| Signal Modulation | CTLMA14  | AAEL014382 | 1.98112199   | -0.382222702 | -0.207276218 |
| Signal Modulation | CTLMA15  | AAEL000563 | -5.459431619 | -0.415037499 | NA           |
| Signal Modulation | CTLSE1   | AAEL008929 | -2           | 0.604071324  | NA           |
| Signal Modulation | GALE1    | AAEL003541 | 0.51315313   | 0.10059437   | -0.303392143 |
| Signal Modulation | GALE12   | AAEL009842 | 0.826334772  | 0.067326978  | -0.526880194 |
| Signal Modulation | GALE13   | AAEL009845 | 1.018279736  | -0.256503408 | -0.97340579  |
| Signal Modulation | GALE14   | AAEL009850 | 0.280745856  | -0.353252511 | 0.362398626  |
| Signal Modulation | GALE2    | AAEL012135 | 0.513822824  | 0.021151264  | 0.185140494  |
| Signal Modulation | GALE3    | AAEL004196 | 0.4680812    | -0.162127311 | 0.183748677  |
| Signal Modulation | GALE5    | AAEL003844 | -0.136146086 | 0.018925425  | 0.503649674  |
| Signal Modulation | GALE6A   | AAEL005294 | 2.412939033  | -0.181656367 | NA           |
| Signal Modulation | GALE6B   | AAEL012003 | -5.426264755 | NA           | NA           |
| Signal Modulation | GALE8B_a | AAEL005293 | 0.623091446  | -0.305711536 | 0.241603882  |
| Signal Modulation | SCRAL1   | AAEL015308 | 0.247251409  | 0.182653306  | -0.398435532 |
| Signal Modulation | SCRASP1  | AAEL009192 | 0.735311127  | -0.617511195 | -0.110747066 |
| Signal Modulation | SCRB10   | AAEL007748 | -0.177787119 | 0.017382078  | 1.544320516  |

|                          |        |            |              |              |              |
|--------------------------|--------|------------|--------------|--------------|--------------|
| <b>Signal Modulation</b> | SCRB16 | AAEL005981 | 1.662965013  | 3.584962501  | NA           |
| <b>Signal Modulation</b> | SCRB17 | AAEL008370 | 0.416580214  | 0            | 0.120784711  |
| <b>Signal Modulation</b> | SCRB3  | AAEL005979 | -2.268488836 | -0.321928095 | 4.392317423  |
| <b>Signal Modulation</b> | SCRB5  | AAEL011222 | -0.593679718 | 0.6983443    | -1.070389328 |
| <b>Signal Modulation</b> | SCRB6  | AAEL002741 | 4.584962501  | 3.584962501  | -1           |
| <b>Signal Modulation</b> | SCRB7  | AAEL000234 | 1.408968663  | 0.027032959  | -0.151655414 |
| <b>Signal Modulation</b> | SCRB8  | AAEL000227 | 0.444943984  | 0.479587815  | -0.170352403 |
| <b>Signal Modulation</b> | SCRB9  | AAEL000256 | 2.102361718  | -0.107640723 | -1           |
| <b>Signal Modulation</b> | SCRBQ1 | AAEL009420 | 0.075981918  | 0.313284     | 0.368067633  |
| <b>Signal Modulation</b> | SCRBQ2 | AAEL009423 | 0.630664714  | 0.077006645  | -0.151086078 |
| <b>Signal Modulation</b> | SCRBQ3 | AAEL009432 | 0.147906057  | 0.206959451  | 0.219424409  |
| <b>Signal Modulation</b> | SCRC1  | AAEL006355 | -0.898120386 | 1.070389328  | -1           |
| <b>Signal Modulation</b> | SCRC2  | AAEL006361 | 0.115477217  | -0.310340121 | 0            |
| <b>Toll</b>              | CACT   | AAEL000709 | -0.191724952 | 0.119652203  | 0.095476315  |
| <b>Imd</b>               | FADD   | AAEL001932 | -0.051428239 | -0.980100443 | -1.802963153 |
| <b>Toll</b>              | MYD    | AAEL007768 | 1.724513853  | 0.266633375  | -0.128254491 |
| <b>Toll</b>              | PELLE  | AAEL006571 | -0.173610048 | 0.628452324  | 0.137858911  |
| <b>Toll</b>              | REL1A  | AAEL007696 | 0.028827406  | 0.1616709    | 0.068456979  |
| <b>Toll</b>              | SPZ1C  | AAEL013433 | -6.22881869  | 0            | NA           |
| <b>Toll</b>              | SPZ3A  | AAEL008596 | 0.719892081  | 0.225292312  | -0.364764293 |
| <b>Toll</b>              | SPZ3B  | AAEL014950 | 1.104829973  | -0.248048226 | 0.44625623   |
| <b>Toll</b>              | SPZ4   | AAEL007897 | 6.794415866  | -0.185031894 | 0            |
| <b>Toll</b>              | SPZ5   | AAEL001929 | 1.509861045  | 2.017073513  | 0            |
| <b>Toll</b>              | SPZ6   | AAEL012164 | 4            | -1.584962501 | 4.95419631   |
| <b>Toll</b>              | TOLL   | AAEL001771 | 2.321928095  | NA           | NA           |
| <b>Toll</b>              | TOLL   | AAEL015018 | 2.184337659  | 0.352406511  | -0.922757001 |

|             |                    |            |              |              |              |
|-------------|--------------------|------------|--------------|--------------|--------------|
| <b>Toll</b> | TOLL10             | AAEL004000 | 0.321928095  | -1           | -2           |
| <b>Toll</b> | TOLL11             | AAEL009551 | 0.884522783  | 0.440572591  | 0            |
| <b>Toll</b> | TOLL1A             | AAEL007613 | 1.851677253  | 0.247092862  | 0.142352923  |
| <b>Toll</b> | TOLL4              | AAEL017523 | -0.925999419 | 0.135883428  | -1.963474124 |
| <b>Toll</b> | TOLL5A             | AAEL007619 | 1.393914208  | -0.283031314 | -0.30218416  |
| <b>Toll</b> | TOLL5B             | AAEL000057 | 1.437155905  | 0.169925001  | 0.127111918  |
| <b>Toll</b> | TOLL6              | AAEL000671 | 3.700439718  | 0            | -2           |
| <b>Toll</b> | TOLL7              | AAEL002583 | 2.321928095  | -5.247927513 | 0.716207034  |
| <b>Toll</b> | TOLL9A             | AAEL013441 | 0.65732382   | 0.298210834  | 0.10269495   |
| <b>Toll</b> | TOLL9B             | AAEL011734 | 0.47714903   | 0.51908019   | 0.035436045  |
| <b>Toll</b> | Toll-like receptor | AAEL006212 | 1.595669007  | 0.196320736  | -1.115477217 |
| <b>Toll</b> | TUBE               | AAEL007642 | 0.9510904    | -0.051715037 | -1.344334508 |

**Supplementary Table 2. Relative abundance of bacteria phylum in mosquito midgut (%)**

| <b>Taxa</b>                   | <b>GFP dsRNA</b> | <b>AaMesh dsRNA</b> |
|-------------------------------|------------------|---------------------|
| Unassigned;Other              | 0.026585563      | 0.018609894         |
| k__Bacteria;p__Actinobacteria | 2.670253945      | 0.179186694         |
| k__Bacteria;p__Bacteroidetes  | 72.33346803      | 4.392998426         |
| k__Bacteria;p__Cyanobacteria  | 4.25E-03         | 0                   |
| k__Bacteria;p__Firmicutes     | 1.150623166      | 26.0575737          |
| k__Bacteria;p__Planctomycetes | 0.020736739      | 5.85E-03            |
| k__Bacteria;p__Proteobacteria | 23.77759581      | 69.34365562         |
| k__Bacteria;p__[Thermi]       | 0.016483049      | 2.13E-03            |

k: Kingdom; p: Phylum.

**Supplementary Table 3. Relative abundance of bacteria genus in mosquito midgut (%)**

| Taxa                                                                                                              | GFP dsRNA   | AaMesh dsRNA |
|-------------------------------------------------------------------------------------------------------------------|-------------|--------------|
| Unassigned;Other;Other;Other;Other;Other                                                                          | 0.026585563 | 0.018609894  |
| k__Bacteria;p__Actinobacteria;c__Actinobacteria;o__Actinomycetales;f__Brevibacteriaceae;g__Brevibacterium         | 0.022863584 | 0.001063423  |
| k__Bacteria;p__Actinobacteria;c__Actinobacteria;o__Actinomycetales;f__Corynebacteriaceae;g__Corynebacterium       | 0.001063423 | 0.001595134  |
| k__Bacteria;p__Actinobacteria;c__Actinobacteria;o__Actinomycetales;f__Micrococcaceae;g__Kocuria                   | 0.052107703 | 0.001063423  |
| k__Bacteria;p__Actinobacteria;c__Actinobacteria;o__Actinomycetales;f__Micrococcaceae;g__Micrococcus               | 0.162703645 | 0.00425369   |
| k__Bacteria;p__Actinobacteria;c__Actinobacteria;o__Actinomycetales;f__Nocardioideaceae;g__                        | 0.00850738  | 0            |
| k__Bacteria;p__Actinobacteria;c__Actinobacteria;o__Actinomycetales;f__Nocardioideaceae;g__Nocardioides            | 0.022331873 | 0.000531711  |
| k__Bacteria;p__Actinobacteria;c__Actinobacteria;o__Actinomycetales;f__Propionibacteriaceae;g__Propionibacterium   | 0.057956527 | 0.002126845  |
| k__Bacteria;p__Actinobacteria;c__Rubrobacteria;o__Rubrobacterales;f__Rubrobacteraceae;g__Rubrobacter              | 2.342719809 | 0.168552469  |
| k__Bacteria;p__Bacteroidetes;c__Cytophagia;o__Cytophagales;f__Cytophagaceae;g__                                   | 0.009039091 | 0            |
| k__Bacteria;p__Bacteroidetes;c__Cytophagia;o__Cytophagales;f__Cytophagaceae;g__Spirosoma                          | 0.014356204 | 0.009039091  |
| k__Bacteria;p__Bacteroidetes;c__Flavobacteriia;o__Flavobacteriales;f__Flavobacteriaceae;g__                       | 0.005317113 | 0.004785401  |
| k__Bacteria;p__Bacteroidetes;c__Flavobacteriia;o__Flavobacteriales;f__Flavobacteriaceae;g__Flavobacterium         | 0.094644604 | 0.012229359  |
| k__Bacteria;p__Proteobacteria;c__Gammaproteobacteria;o__Pseudomonadales;f__Moraxellaceae;g__Acinetobacter         | 0.199391722 | 0.005317113  |
| k__Bacteria;p__Bacteroidetes;c__Flavobacteriia;o__Flavobacteriales;f__[Weeksellaceae];g__Elizabethkingia          | 71.99848994 | 4.357905483  |
| k__Bacteria;p__Bacteroidetes;c__Sphingobacteriia;o__Sphingobacteriales;f__Sphingobacteriaceae;g__Sphingobacterium | 0.012229359 | 0.003721979  |
| k__Bacteria;p__Cyanobacteria;c__Chloroplast;o__Chlorophyta;f__Trebouxiophyceae;g__                                | 0.00425369  | 0            |
| k__Bacteria;p__Firmicutes;c__Bacilli;o__Bacillales;f__Bacillaceae;g__Anoxybacillus                                | 0.090390914 | 0.003190268  |
| k__Bacteria;p__Firmicutes;c__Bacilli;o__Bacillales;f__Bacillaceae;g__Bacillus                                     | 0.092517759 | 0.001063423  |
| k__Bacteria;p__Firmicutes;c__Bacilli;o__Bacillales;f__Planococcaceae;g__Planococcus                               | 0.036156366 | 0.000531711  |
| k__Bacteria;p__Firmicutes;c__Bacilli;o__Bacillales;f__Staphylococcaceae;g__Staphylococcus                         | 0.155791399 | 0.048385725  |
| k__Bacteria;p__Firmicutes;c__Bacilli;o__Lactobacillales;f__Aerococcaceae;g__                                      | 0.108469097 | 0            |
| k__Bacteria;p__Firmicutes;c__Bacilli;o__Lactobacillales;f__Aerococcaceae;g__Aerococcus                            | 0.182908673 | 0            |
| k__Bacteria;p__Firmicutes;c__Bacilli;o__Lactobacillales;f__Enterococcaceae;Other                                  | 0.001063423 | 0.081883534  |
| k__Bacteria;p__Firmicutes;c__Bacilli;o__Lactobacillales;f__Lactobacillaceae;g__Lactobacillus                      | 0.044663746 | 0            |
| k__Bacteria;p__Firmicutes;c__Bacilli;o__Lactobacillales;f__Streptococcaceae;g__Lactococcus                        | 0.360500234 | 25.92198732  |
| k__Bacteria;p__Firmicutes;c__Bacilli;o__Lactobacillales;f__Streptococcaceae;g__Streptococcus                      | 0.039346633 | 0            |
| k__Bacteria;p__Firmicutes;c__Clostridia;o__Clostridiales;f__Lachnospiraceae;g__Catonella                          | 0.007443958 | 0            |
| k__Bacteria;p__Firmicutes;c__Clostridia;o__Clostridiales;f__Veillonellaceae;g__Veillonella                        | 0.023395295 | 0            |
| k__Bacteria;p__Firmicutes;c__Clostridia;o__Clostridiales;f__[Tissierellaceae];g__Anaerococcus                     | 0.007975669 | 0.000531711  |
| k__Bacteria;p__Planctomycetes;c__Planctomycetia;o__Planctomycetales;f__Planctomycetaceae;g__Planctomyces          | 0.020736739 | 0.005848824  |
| k__Bacteria;p__Proteobacteria;c__Alphaproteobacteria;o__Caulobacterales;f__Caulobacteraceae;g__                   | 0.597643456 | 0.065400485  |
| k__Bacteria;p__Proteobacteria;c__Alphaproteobacteria;o__Caulobacterales;f__Caulobacteraceae;g__Brevundimonas      | 3.323195372 | 0.017546472  |



| Taxa                                                                                                            | GFP dsRNA   | AaMesh dsRNA |
|-----------------------------------------------------------------------------------------------------------------|-------------|--------------|
| k__Bacteria;p__Proteobacteria;c__Alphaproteobacteria;o__Caulobacterales;f__Caulobacteraceae;g__Mycoplana        | 0.168552469 | 0.027117274  |
| k__Bacteria;p__Proteobacteria;c__Alphaproteobacteria;o__Rhizobiales;f__;                                        | 0.020205028 | 0            |
| k__Bacteria;p__Proteobacteria;c__Alphaproteobacteria;o__Rhizobiales;f__Beijerinckiaceae;g__                     | 0.007975669 | 0.000531711  |
| k__Bacteria;p__Proteobacteria;c__Alphaproteobacteria;o__Rhizobiales;f__Bradyrhizobiaceae;g__                    | 0.002126845 | 0            |
| k__Bacteria;p__Proteobacteria;c__Alphaproteobacteria;o__Rhizobiales;f__Brucellaceae;g__Ochrobactrum             | 0.09730316  | 0.018078183  |
| k__Bacteria;p__Proteobacteria;c__Alphaproteobacteria;o__Rhizobiales;f__Hyphomicrobiaceae;g__Devosia             | 0.002126845 | 0.000531711  |
| k__Bacteria;p__Proteobacteria;c__Alphaproteobacteria;o__Rhizobiales;f__Hyphomicrobiaceae;g__Hyphomicrobium      | 0.085605513 | 0            |
| k__Bacteria;p__Proteobacteria;c__Alphaproteobacteria;o__Rhizobiales;f__Methylobacteriaceae;g__                  | 0.018609894 | 0.026053852  |
| k__Bacteria;p__Proteobacteria;c__Alphaproteobacteria;o__Rhizobiales;f__Methylobacteriaceae;g__Methylobacterium  | 0.007975669 | 0            |
| k__Bacteria;p__Proteobacteria;c__Alphaproteobacteria;o__Rhizobiales;f__Phyllobacteriaceae;Other                 | 0.01701476  | 0.006912246  |
| k__Bacteria;p__Proteobacteria;c__Alphaproteobacteria;o__Rhizobiales;f__Rhizobiaceae;g__Agrobacterium            | 0.044663746 | 0.004785401  |
| k__Bacteria;p__Proteobacteria;c__Alphaproteobacteria;o__Rhizobiales;f__Xanthobacteraceae;g__Xanthobacter        | 0.096771449 | 0            |
| k__Bacteria;p__Proteobacteria;c__Alphaproteobacteria;o__Rhodobacterales;f__Hyphomonadaceae;g__                  | 0.06752733  | 0            |
| k__Bacteria;p__Proteobacteria;c__Alphaproteobacteria;o__Rhodobacterales;f__Rhodobacteraceae;g__Anaerospira      | 0.173337871 | 0.026053852  |
| k__Bacteria;p__Proteobacteria;c__Alphaproteobacteria;o__Rhodobacterales;f__Rhodobacteraceae;g__Paracoccus       | 0.023395295 | 0.006912246  |
| k__Bacteria;p__Proteobacteria;c__Alphaproteobacteria;o__Rhodobacterales;f__Rhodobacteraceae;g__Rhodobacter      | 0.006912246 | 0.000531711  |
| k__Bacteria;p__Proteobacteria;c__Alphaproteobacteria;o__Rhodobacterales;f__Rhodobacteraceae;g__Rubellimicrobium | 0.051044281 | 0.002658556  |
| k__Bacteria;p__Proteobacteria;c__Alphaproteobacteria;o__Rhodospirillales;f__Acetobacteraceae;g__                | 0.107937386 | 0.035624654  |
| k__Bacteria;p__Proteobacteria;c__Alphaproteobacteria;o__Rhodospirillales;f__Acetobacteraceae;g__Acetobacter     | 0           | 0.081883534  |
| k__Bacteria;p__Proteobacteria;c__Alphaproteobacteria;o__Rhodospirillales;f__Rhodospirillaceae;g__               | 0.004785401 | 0.003190268  |
| k__Bacteria;p__Proteobacteria;c__Alphaproteobacteria;o__Sphingomonadales;f__Sphingomonadaceae;g__               | 0.00850738  | 0.010102514  |
| k__Bacteria;p__Proteobacteria;c__Alphaproteobacteria;o__Sphingomonadales;f__Sphingomonadaceae;g__Sphingobium    | 0.037219788 | 0            |
| k__Bacteria;p__Proteobacteria;c__Alphaproteobacteria;o__Sphingomonadales;f__Sphingomonadaceae;g__Sphingomonas   | 0.193542898 | 0.028712408  |
| k__Bacteria;p__Proteobacteria;c__Alphaproteobacteria;o__Sphingomonadales;f__Sphingomonadaceae;g__Sphingopyxis   | 0.061678506 | 0.001595134  |
| k__Bacteria;p__Proteobacteria;c__Betaproteobacteria;o__Burkholderiales;f__;                                     | 0.01701476  | 0            |
| k__Bacteria;p__Proteobacteria;c__Betaproteobacteria;o__Burkholderiales;f__Alcaligenaceae;g__Achromobacter       | 0.922519035 | 0.222787018  |
| k__Bacteria;p__Proteobacteria;c__Betaproteobacteria;o__Burkholderiales;f__Comamonadaceae;g__                    | 0.05901995  | 0.000531711  |
| k__Bacteria;p__Proteobacteria;c__Betaproteobacteria;o__Burkholderiales;f__Comamonadaceae;g__Acidovorax          | 0.045195457 | 0            |
| k__Bacteria;p__Proteobacteria;c__Betaproteobacteria;o__Burkholderiales;f__Comamonadaceae;g__Comamonas           | 4.730635076 | 0.449296014  |
| k__Bacteria;p__Proteobacteria;c__Betaproteobacteria;o__Burkholderiales;f__Comamonadaceae;g__Delftia             | 0.309987664 | 0.001063423  |
| k__Bacteria;p__Proteobacteria;c__Betaproteobacteria;o__Burkholderiales;f__Oxalobacteraceae;Other                | 0.049980858 | 0            |
| k__Bacteria;p__Proteobacteria;c__Betaproteobacteria;o__Burkholderiales;f__Oxalobacteraceae;g__                  | 0.048385725 | 0.000531711  |
| k__Bacteria;p__Proteobacteria;c__Betaproteobacteria;o__Burkholderiales;f__Oxalobacteraceae;g__Ralstonia         | 0.040410056 | 0.020205028  |
| k__Bacteria;p__Proteobacteria;c__Betaproteobacteria;o__Methylophilales;f__Methylophilaceae;g__                  | 0.006912246 | 0            |

| Taxa                                                                                                           | GFP dsRNA   | AaMesh dsRNA |
|----------------------------------------------------------------------------------------------------------------|-------------|--------------|
| k_Bacteria;p__Proteobacteria;c__Betaproteobacteria;o__Neisseriales;f__Neisseriaceae;g__Chromobacterium         | 0.00850738  | 1.206452848  |
| k_Bacteria;p__Proteobacteria;c__Betaproteobacteria;o__Rhodocyclales;f__Rhodocyclaceae;g__Zoogloea              | 0.001063423 | 0            |
| k_Bacteria;p__Proteobacteria;c__Deltaproteobacteria;o__Myxococcales;f__Haliangiaceae;g__                       | 0           | 0.006380535  |
| k_Bacteria;p__Proteobacteria;c__Gammaproteobacteria;o__Aeromonadales;f__Aeromonadaceae;g__                     | 0.125483857 | 0.027117274  |
| k_Bacteria;p__Proteobacteria;c__Gammaproteobacteria;o__Alteromonadales;f__Alteromonadaceae;g__Cellvibrio       | 0.02126845  | 0.003721979  |
| k_Bacteria;p__Proteobacteria;c__Gammaproteobacteria;o__Enterobacteriales;f__Enterobacteriaceae;g__             | 1.864179676 | 0.153132843  |
| k_Bacteria;p__Proteobacteria;c__Gammaproteobacteria;o__Enterobacteriales;f__Enterobacteriaceae;g__Enterobacter | 0.058488239 | 0.000531711  |
| k_Bacteria;p__Proteobacteria;c__Gammaproteobacteria;o__Enterobacteriales;f__Enterobacteriaceae;g__Morganella   | 0.784805819 | 0.040410056  |
| k_Bacteria;p__Proteobacteria;c__Gammaproteobacteria;o__Enterobacteriales;f__Enterobacteriaceae;g__Serratia     | 0.026053852 | 0            |
| k_Bacteria;p__Bacteroidetes;c__Flavobacteriia;o__Flavobacteriales;f__[Weeksellaceae];g__Chryseobacterium       | 7.137691948 | 0.37166617   |
| k_Bacteria;p__Proteobacteria;c__Gammaproteobacteria;o__Pseudomonadales;f__Moraxellaceae;g__Enhydrobacter       | 0.02126845  | 0.04625888   |
| k_Bacteria;p__Proteobacteria;c__Gammaproteobacteria;o__Pseudomonadales;f__Pseudomonadaceae;Other               | 0.451422859 | 0.018078183  |
| k_Bacteria;p__Proteobacteria;c__Gammaproteobacteria;o__Pseudomonadales;f__Pseudomonadaceae;g__                 | 0.003721979 | 0.74705432   |
| k_Bacteria;p__Proteobacteria;c__Gammaproteobacteria;o__Pseudomonadales;f__Pseudomonadaceae;g__Pseudomonas      | 1.429239866 | 65.61795483  |
| k_Bacteria;p__Proteobacteria;c__Gammaproteobacteria;o__Xanthomonadales;f__Xanthomonadaceae;g__                 | 0.280743545 | 0.04200519   |
| k_Bacteria;p__Proteobacteria;c__Gammaproteobacteria;o__Xanthomonadales;f__Xanthomonadaceae;g__Pseudoxanthomor  | 0.00850738  | 0.000531711  |
| k_Bacteria;p__Proteobacteria;c__Gammaproteobacteria;o__Xanthomonadales;f__Xanthomonadaceae;g__Stenotrophomona  | 0.099430006 | 0.003721979  |
| k_Bacteria;p__[Thermi];c__Deinococci;o__Thermales;f__Thermaceae;g__Thermus                                     | 0.016483049 | 0.002126845  |

k: Kingdom; p: Phylum; c: Class; o: Order; f: Family; g: Genus.

**Supplementary Table 4. Relative abundance of bacteria phylum in *Drosophila* gut (%)**

| <b>#OTU ID</b>                | <b>Control</b> | <b>DmMesh RNAi</b> |
|-------------------------------|----------------|--------------------|
| Unassigned;Other              | 0.021002554    | 0.032236479        |
| k__Bacteria;p__Actinobacteria | 0.108431793    | 0.018071965        |
| k__Bacteria;p__Bacteroidetes  | 14.74428169    | 8.235931952        |
| k__Bacteria;p__Cyanobacteria  | 0              | 8.30E-03           |
| k__Bacteria;p__Firmicutes     | 69.58195148    | 2.859766432        |
| k__Bacteria;p__Proteobacteria | 15.54433249    | 88.84568984        |

k: Kingdom; p: Phylum.

**Supplementary Table 5. Relative abundance of bacteria genus in *Drosophila* gut (%)**

| #OTU ID                                                                                                        | Control     | DmMesh RNAi |
|----------------------------------------------------------------------------------------------------------------|-------------|-------------|
| Unassigned;Other;Other;Other;Other;Other                                                                       | 0.021002554 | 0.032236479 |
| k__Bacteria;p__Actinobacteria;c__Rubrobacteria;o__Rubrobacteriales;f__Rubrobacteraceae;g__Rubrobacter          | 0.108431793 | 0.018071965 |
| k__Bacteria;p__Bacteroidetes;c__Flavobacteriia;o__Flavobacteriales;f__Flavobacteriaceae;g__Flavobacterium      | 0.004395883 | 0.000488431 |
| k__Bacteria;p__Bacteroidetes;c__Flavobacteriia;o__Flavobacteriales;f__[Weeksellaceae];g__Chryseobacterium      | 0.012699219 | 0.009280198 |
| k__Bacteria;p__Bacteroidetes;c__Flavobacteriia;o__Flavobacteriales;f__[Weeksellaceae];g__Elizabethkingia       | 14.72718659 | 8.226163322 |
| k__Bacteria;p__Cyanobacteria;c__Chloroplast;o__Streptophyta;f__;g__                                            | 0           | 0.008303335 |
| k__Bacteria;p__Firmicutes;c__Bacilli;o__Lactobacillales;f__Aerococcaceae;g__Aerococcus                         | 0.00341902  | 0.004395883 |
| k__Bacteria;p__Firmicutes;c__Bacilli;o__Lactobacillales;f__Enterococcaceae;g__Enterococcus                     | 54.92607589 | 1.236708558 |
| k__Bacteria;p__Firmicutes;c__Bacilli;o__Lactobacillales;f__Lactobacillaceae;g__                                | 14.15718703 | 0.320899495 |
| k__Bacteria;p__Firmicutes;c__Bacilli;o__Lactobacillales;f__Lactobacillaceae;g__Lactobacillus                   | 0.00341902  | 0.067891978 |
| k__Bacteria;p__Firmicutes;c__Bacilli;o__Lactobacillales;f__Leuconostocaceae;g__Leuconostoc                     | 0           | 0.001465294 |
| k__Bacteria;p__Firmicutes;c__Bacilli;o__Lactobacillales;f__Streptococcaceae;g__Lactococcus                     | 0.49185052  | 1.228405222 |
| k__Bacteria;p__Proteobacteria;c__Alphaproteobacteria;o__Caulobacteriales;f__Caulobacteraceae;g__               | 0.023444712 | 0.004884315 |
| k__Bacteria;p__Proteobacteria;c__Alphaproteobacteria;o__Caulobacteriales;f__Caulobacteraceae;g__Brevundimonas  | 0.185115538 | 0.014164513 |
| k__Bacteria;p__Proteobacteria;c__Alphaproteobacteria;o__Rhodobacteriales;f__Rhodobacteraceae;g__Anaerospora    | 0.003907452 | 0.001953726 |
| k__Bacteria;p__Proteobacteria;c__Alphaproteobacteria;o__Rhodospirillales;f__Acetobacteraceae;Other             | 0.721413325 | 5.507553593 |
| k__Bacteria;p__Proteobacteria;c__Alphaproteobacteria;o__Rhodospirillales;f__Acetobacteraceae;g__               | 0.356066563 | 0.01318765  |
| k__Bacteria;p__Proteobacteria;c__Alphaproteobacteria;o__Rhodospirillales;f__Acetobacteraceae;g__Acetobacter    | 4.425189389 | 81.3790375  |
| k__Bacteria;p__Proteobacteria;c__Alphaproteobacteria;o__Rickettsiales;f__Rickettsiaceae;g__Wolbachia           | 0.050308444 | 0.001465294 |
| k__Bacteria;p__Proteobacteria;c__Betaproteobacteria;o__Burkholderiales;f__Alcaligenaceae;g__Achromobacter      | 0.049820013 | 0.017583534 |
| k__Bacteria;p__Proteobacteria;c__Betaproteobacteria;o__Burkholderiales;f__Comamonadaceae;g__Comamonas          | 0.201722209 | 0.072776293 |
| k__Bacteria;p__Proteobacteria;c__Betaproteobacteria;o__Burkholderiales;f__Comamonadaceae;g__Delftia            | 0.002442157 | 0.001953726 |
| k__Bacteria;p__Proteobacteria;c__Betaproteobacteria;o__Neisseriales;f__Neisseriaceae;g__Chromobacterium        | 0.038586088 | 0.009280198 |
| k__Bacteria;p__Proteobacteria;c__Gammaproteobacteria;o__Enterobacteriales;f__Enterobacteriaceae;g__            | 0.06838041  | 0.020025691 |
| k__Bacteria;p__Proteobacteria;c__Gammaproteobacteria;o__Enterobacteriales;f__Enterobacteriaceae;g__Morganella  | 0.017095102 | 0.004395883 |
| k__Bacteria;p__Proteobacteria;c__Gammaproteobacteria;o__Pseudomonadales;f__Moraxellaceae;g__Acinetobacter      | 2.493442807 | 0.250076928 |
| k__Bacteria;p__Proteobacteria;c__Gammaproteobacteria;o__Pseudomonadales;f__Pseudomonadaceae;g__                | 3.663724681 | 0.91190161  |
| k__Bacteria;p__Proteobacteria;c__Gammaproteobacteria;o__Pseudomonadales;f__Pseudomonadaceae;g__Pseudomonas     | 3.226090057 | 0.629099772 |
| k__Bacteria;p__Proteobacteria;c__Gammaproteobacteria;o__Xanthomonadales;f__Xanthomonadaceae;g__                | 0.016606671 | 0.006349609 |
| k__Bacteria;p__Proteobacteria;c__Gammaproteobacteria;o__Xanthomonadales;f__Xanthomonadaceae;g__Stenotrophomona | 0.000976863 | 0           |

k: Kingdom; p: Phylum; c: Class; o: Order; f: Family; g: Genus.

**Supplementary Table 6. Primers for qPCR, dsRNA synthesis and genes cloning**

|                                                        | Upper primer                                             | Lower primer                                 |
|--------------------------------------------------------|----------------------------------------------------------|----------------------------------------------|
| <b>Primers for cloning into pAc5.1/V5-His/A</b>        |                                                          |                                              |
| <i>DmMesh</i> (V5 tag in the C-terminal)               | GGGGTACCATGCGTTTCAAAGTCTTTGTG                            | CCGCTCGAGGACCTCCGTGGACTTCTG                  |
| <b>The primers for genes cloning(pET28)</b>            |                                                          |                                              |
| <i>AaMesh</i> (994-1174 aa)                            | CCGGAATTCGTGATAGCACCAAAATTTGAACA                         | GGACTCGAGCACAGCGGTAGACATTCCG                 |
| <b>The primers for RT-QPCR</b>                         |                                                          |                                              |
| <i>AaMesh</i>                                          | GCGCTGGGAAAGCGTTATT                                      | TTCCGGGGTAAGAATTGTGACG                       |
| <i>AaJNK</i>                                           | GATCCGGGGAGGAGTGCTG                                      | CATGAACGAGGGCGACGG                           |
| <i>AaERK</i>                                           | GTGACAAAGACAAAGGTTGCCATC                                 | TCGTGTTTGAACCGGGTG                           |
| <i>AaP38</i>                                           | AATGCTGGAACCTAGACGC                                      | ATACAGCGAAGACGTTGG                           |
| <i>AaP13K</i>                                          | GGCACCAAGGATGGGTTTATG                                    | CAATCTCCGCATAGGTCCAC                         |
| <i>AaMyd88</i>                                         | CGTGATTGGCGAGGGTTGTTTC                                   | ATCCGCTCCAATGCTCGTTTCC                       |
| <i>Aalmd</i>                                           | TCGTCAAACCTCGGTTTTCCT                                    | TGGCGGAGTTGAAGGTAAG                          |
| <i>AaAkt</i>                                           | TATCGGCCTCGGCTATCTACA                                    | GTCTTCGTTGTGCTCCGTAG                         |
| <i>AaDome</i>                                          | AAACGGTGGCAAATGAAC                                       | CATACAGCCGGCTTCTCT                           |
| <i>AaArrestin-a</i>                                    | GGTGTGATGTGGTGCTTTC                                      | AGCCGTGTTGAATCGGACATCC                       |
| <i>AaArrestin-b</i>                                    | AGCAAGCATATCGCCTCACTGG                                   | GGCGGTCCTTGTGCTGGAA                          |
| <i>AaDuox</i>                                          | ATGCTGAGCCAGAGAGATT                                      | TTTCTCATCAGTCAATCG                           |
| <i>AaNox</i>                                           | TCCCAATACGGTTTCGCTA                                      | GCCGTCACACAGAAATGTA                          |
| <i>AaActin</i>                                         | GAAACACCCAGTCTGCTGACA                                    | TGCGTCATCTTCTCACGGTTAG                       |
| <i>Bacterium Universal 16s rRNA</i>                    | TCCTACGGGAGGCAGCAGT                                      | GGACTACAGGGTATCTAATCCTGTT                    |
| <i>C. testosteroni 16s rRNA</i>                        | CGAAAAGCCTGGGGCTAATAT                                    | CCATCTCTGGTAAGTCCCTGC                        |
| <i>C. meningosepticum 16s rRNA</i>                     | ACATGGTACCACCTTCGTGAGA                                   | GTCGCATCCGTTGTTGCTCACTT                      |
| <i>DmMesh</i>                                          | CTTCTACGGCTTCCGATTCACTAC                                 | GTCCACACGGCCTTGCCTGAA                        |
| <i>DmActin</i>                                         | CCCAAGGCCAACCGTGAGAA                                     | CGGAGGGCTACAGCGAGAGC                         |
| <i>DmERK</i>                                           | ATTTGCGACTTTGGATTGCTC                                    | TCTAAGCCCAACGCATCAGAT                        |
| <i>DmJNK</i>                                           | CAGCACCACTACACCCGTCC                                     | CATTTGGATGACCTGCAGAGAT                       |
| <i>DmDuox</i>                                          | CATTCCCTGGACTCGCAC                                       | TCGTGCGATTGGGTGAC                            |
| <i>DmNox</i>                                           | GCCGCAAACCTGATTCTCTG                                     | GTCTCTTGTATGCTGCTATGC                        |
| <i>DmArrestin-1</i>                                    | GCATCGCCGTTGAGGGTATAT                                    | CCTCGCATCTGACTGGCATCA                        |
| <i>DmArrestin-1</i>                                    | CGCCAATCTCACCAAGACCTC                                    | TCGTCTTCAAAGTGACCATCA                        |
| <b>The primers for double-strand RNA synthesis</b>     |                                                          |                                              |
| <i>GFP</i>                                             | TAATACGACTCACTATAGGGGTGAGCAAGGGCGAGGAG                   | TAATACGACTCACTATAGGGCATGATATAGACGTTGTGGCTGTT |
| <i>AAEL004725</i>                                      | TAATACGACTCACTATAGGGCCACGGGGCCTCACAACAG                  | TAATACGACTCACTATAGGGCTACAGAACGGCGGAGGATGG    |
| <i>AAEL005432 (AaMesh)</i>                             | TAATACGACTCACTATAGGGTTGGCCCGACGAAATGAC                   | TAATACGACTCACTATAGGGACTCCGGCGCAACACACAG      |
| <i>AAEL005982</i>                                      | TAATACGACTCACTATAGGGTTTGAAGGAGGCCATAAGTGC                | TAATACGACTCACTATAGGGTACGCCCAAGCTCAAACCTAC    |
| <i>AAEL006355</i>                                      | TAATACGACTCACTATAGGGTCCGCTAGCCGGTCATTTTAT                | TAATACGACTCACTATAGGGCGCGATAGTCGGGGCAACAT     |
| <i>AAEL006361</i>                                      | TAATACGACTCACTATAGGGCGGGCCTTTTCTTCTCC                    | TAATACGACTCACTATAGGGCGCGAGTGCAGCTCATCAGG     |
| <i>AAEL008069</i>                                      | TAATACGACTCACTATAGGGGCTACGGGCGTGAAGAGTGT                 | TAATACGACTCACTATAGGGTGGCTCCGATAGGCATAAGTCCG  |
| <i>AAEL008929</i>                                      | TAATACGACTCACTATAGGGGGGCAAGATCAACCGAACA                  | TAATACGACTCACTATAGGGAAAGCCGACGACAGGACAG      |
| <i>AAEL009266</i>                                      | TAATACGACTCACTATAGGGGTGGCCCTCCGGTAAATTC                  | TAATACGACTCACTATAGGGTCCCGGGTAAACGATTGAC      |
| <i>AAEL012452</i>                                      | TAATACGACTCACTATAGGGGTGCGCCCATCATTCAACC                  | TAATACGACTCACTATAGGGCTCGCATCGGCTCCCTCAA      |
| <i>AAEL014356</i>                                      | TAATACGACTCACTATAGGGGTGTGGCGTCCGCATAGAACC                | TAATACGACTCACTATAGGGAGGGCGCTCAACCCATTT       |
| <i>AaArrestin-a</i>                                    | TAATACGACTCACTATAGGGGGCCTCCGAACAGATCTATCCA               | TAATACGACTCACTATAGGGGCTTGACTTTCTTACCACCT     |
| <i>AaArrestin-b</i>                                    | TAATACGACTCACTATAGGGCTCCAAAGGAGTTGGTCTGTGC               | TAATACGACTCACTATAGGGGGTCTTGCCTGAGTTGTTCTG    |
| <i>AaJNK</i>                                           | TAATACGACTCACTATAGGGATTGAGGTCCCTTCGCGGTACA               | TAATACGACTCACTATAGGGAGATGACCTGGCACAGATT      |
| <i>AaERK</i>                                           | TAATACGACTCACTATAGGGAAGATGGTACCAGCGCCG                   | TAATACGACTCACTATAGGGAGCCCGAGGGCTTCTCTCGA     |
| <i>AaP38</i>                                           | TAATACGACTCACTATAGGGATCTGTTCTGCAACGGACA                  | TAATACGACTCACTATAGGGACCCGTAGAATCTGATAGA      |
| <i>AaP13K</i>                                          | TAATACGACTCACTATAGGGCTCATCAACAACATCACCATCTG              | TAATACGACTCACTATAGGGTACTGGAAGTTGATAATCGGGTG  |
| <i>AaMyd88</i>                                         | TAATACGACTCACTATAGGGGCGGATTGGTGGTTGTTATT                 | TAATACGACTCACTATAGGGTGGAGCGATTGCTAACATC      |
| <i>Aalmd</i>                                           | TAATACGACTCACTATAGGGAAGGCTTCTACCAATGTAA                  | TAATACGACTCACTATAGGGGACAGTGTTTAGACTTTC       |
| <i>AaAkt</i>                                           | TAATACGACTCACTATAGGGACCCGACGAGGCTGCCAG                   | TAATACGACTCACTATAGGGGTACGGGATTCTCGGCCA       |
| <i>AaDome</i>                                          | TAATACGACTCACTATAGGGCCATCTCCACCACGAAACTT                 | TAATACGACTCACTATAGGGCCGGTGGTCCATATAATC       |
| <i>DmArrestin-1</i>                                    | TAATACGACTCACTATAGGGGAGATGATCGGTCTGCGGTTCC               | TAATACGACTCACTATAGGGTCTTCCAGGACTTCTTGGGA     |
| <i>DmArrestin-2</i>                                    | TAATACGACTCACTATAGGGGAGATGACACCGATGCAGGAG                | TAATACGACTCACTATAGGGACACGGTCACTTTGCCCTTCTT   |
| <i>AaNox</i>                                           | TAATACGACTCACTATAGGGGCTCAGCACGCCATCTCATTTG               | TAATACGACTCACTATAGGGGTTGAGCGCTCCACAGATC      |
| <i>AaDuox</i>                                          | TAATACGACTCACTATAGGGAGCCCGGAGAGTTGTAGTAG                 |                                              |
| <b>The primers for generate <i>DmMesh</i>-/- Flies</b> |                                                          |                                              |
| <i>DmMesh-gRNA-1</i>                                   | TAATACGACTCACTATAGTCTTCCGATCAAGGACGTTTTAGAGCTAGAAATAGC   |                                              |
| <i>DmMesh-gRNA-2</i>                                   | TAATACGACTCACTATAGGACGCCCGGCTTTACTTCGTTTTAGAGCTAGAAATAGC |                                              |
| <i>DmMesh-gRNA-check</i>                               | ATCCAACAATCTCCTCTTACAGC                                  | AAATGCCACGAGAAACAAGGG                        |
